# Supplementary material for: Community, Time, and (Con)text: A Dynamical Systems Analysis of Online Communication and Community Health among Open‐Source Software Communities
Source: PubMed Central journal article supplement (PMC9287033; doi:10.1111/cogs.13134), 2022-05-17
Supplement: COGS-46-0-s001.pdf [file COGS-46-0-s001.pdf]

**Supplementary Figures**

|              |                                                                                                        | t-stat  | p-val. | p-val adj. | sig. |
|--------------|--------------------------------------------------------------------------------------------------------|---------|--------|------------|------|
| Main         | $\mu_{\text{member}} = \mu_{\text{nonmember}}$                                                         | -0.115  | 0.908  | 0.942      |      |
|              | $\mu_{\text{post:issue}} = \mu_{\text{comment:issue}}$                                                 | -9.671  | 0.000  | 0.000      | ***  |
|              | $\mu_{\text{post:PR}} = \mu_{\text{comment:PR}}$                                                       | -12.528 | 0.000  | 0.000      | ***  |
|              | $\mu_{\text{post:issue}} = \mu_{\text{post:PR}}$                                                       | -0.692  | 0.489  | 0.594      |      |
|              | $\mu_{\text{comment:issue}} = \mu_{\text{comment:PR}}$                                                 | -3.660  | 0.000  | 0.001      | ***  |
| 2W           | $\mu_{\text{post:issue} \times \text{member}} = \mu_{\text{post:issue} \times \text{nonmember}}$       | -0.768  | 0.442  | 0.549      |      |
|              | $\mu_{\text{comment:issue} \times \text{member}} = \mu_{\text{comment:issue} \times \text{nonmember}}$ | -2.489  | 0.013  | 0.024      | *    |
|              | $\mu_{\text{post:PR} \times \text{member}} = \mu_{\text{post:PR} \times \text{nonmember}}$             | -2.791  | 0.005  | 0.010      | *    |
|              | $\mu_{\text{comment:PR} \times \text{member}} = \mu_{\text{comment:PR} \times \text{nonmember}}$       | -0.561  | 0.575  | 0.674      |      |
|              | $\mu_{\text{post:issue} \times \text{member}} = \mu_{\text{comment:issue} \times \text{member}}$       | -7.957  | 0.000  | 0.000      | ***  |
|              | $\mu_{\text{post:issue} \times \text{nonmember}} = \mu_{\text{comment:issue} \times \text{nonmember}}$ | -10.126 | 0.000  | 0.000      | ***  |
|              | $\mu_{\text{post:PR} \times \text{member}} = \mu_{\text{comment:PR} \times \text{member}}$             | -11.901 | 0.000  | 0.000      | ***  |
|              | $\mu_{\text{post:PR} \times \text{nonmember}} = \mu_{\text{comment:PR} \times \text{nonmember}}$       | -9.623  | 0.000  | 0.000      | ***  |
|              | $\mu_{\text{post:issue} \times \text{member}} = \mu_{\text{post:PR} \times \text{member}}$             | 0.232   | 0.816  | 0.884      |      |
|              | $\mu_{\text{post:issue} \times \text{nonmember}} = \mu_{\text{post:PR} \times \text{nonmember}}$       | -1.828  | 0.068  | 0.105      |      |
|              | $\mu_{\text{comment:issue} \times \text{member}} = \mu_{\text{comment:PR} \times \text{member}}$       | -3.625  | 0.000  | 0.001      | ***  |
|              | $\mu_{\text{comment:issue} \times \text{nonmember}} = \mu_{\text{comment:PR} \times \text{nonmember}}$ | -1.797  | 0.072  | 0.110      |      |
| scikit-learn | $\mu_{\text{post:issue} \times \text{member}} = \mu_{\text{post:issue} \times \text{nonmember}}$       | -0.712  | 0.477  | 0.585      |      |
|              | $\mu_{\text{comment:issue} \times \text{member}} = \mu_{\text{comment:issue} \times \text{nonmember}}$ | -3.612  | 0.000  | 0.001      | ***  |
|              | $\mu_{\text{post:PR} \times \text{member}} = \mu_{\text{post:PR} \times \text{nonmember}}$             | -0.011  | 0.991  | 0.993      |      |
|              | $\mu_{\text{comment:PR} \times \text{member}} = \mu_{\text{comment:PR} \times \text{nonmember}}$       | -0.842  | 0.400  | 0.502      |      |
|              | $\mu_{\text{post:issue} \times \text{member}} = \mu_{\text{comment:issue} \times \text{member}}$       | -8.913  | 0.000  | 0.000      | ***  |
|              | $\mu_{\text{post:issue} \times \text{nonmember}} = \mu_{\text{comment:issue} \times \text{nonmember}}$ | -12.536 | 0.000  | 0.000      | ***  |
|              | $\mu_{\text{post:PR} \times \text{member}} = \mu_{\text{comment:PR} \times \text{member}}$             | -12.627 | 0.000  | 0.000      | ***  |
|              | $\mu_{\text{post:PR} \times \text{nonmember}} = \mu_{\text{comment:PR} \times \text{nonmember}}$       | -13.351 | 0.000  | 0.000      | ***  |
|              | $\mu_{\text{post:issue} \times \text{member}} = \mu_{\text{post:PR} \times \text{member}}$             | -1.877  | 0.061  | 0.095      | .    |
|              | $\mu_{\text{post:issue} \times \text{nonmember}} = \mu_{\text{post:PR} \times \text{nonmember}}$       | -1.344  | 0.179  | 0.250      |      |

Continued on next page

|                                                                                                        |                                                                                                        | t-stat                                                                                                 | p-val. | p-val adj. | sig.  |   |
|--------------------------------------------------------------------------------------------------------|--------------------------------------------------------------------------------------------------------|--------------------------------------------------------------------------------------------------------|--------|------------|-------|---|
|                                                                                                        | $\mu_{\text{comment:issue} \times \text{member}} = \mu_{\text{comment:PR} \times \text{member}}$       | -6.375                                                                                                 | 0.000  | 0.000      | ***   |   |
|                                                                                                        | $\mu_{\text{comment:issue} \times \text{nonmember}} = \mu_{\text{comment:PR} \times \text{nonmember}}$ | -3.797                                                                                                 | 0.000  | 0.000      | ***   |   |
| scikit-image                                                                                           | $\mu_{\text{post:issue} \times \text{member}} = \mu_{\text{post:issue} \times \text{nonmember}}$       | -1.315                                                                                                 | 0.189  | 0.257      |       |   |
|                                                                                                        | $\mu_{\text{comment:issue} \times \text{member}} = \mu_{\text{comment:issue} \times \text{nonmember}}$ | -1.323                                                                                                 | 0.186  | 0.256      |       |   |
|                                                                                                        | $\mu_{\text{post:PR} \times \text{member}} = \mu_{\text{post:PR} \times \text{nonmember}}$             | -7.070                                                                                                 | 0.000  | 0.000      | ***   |   |
|                                                                                                        | $\mu_{\text{comment:PR} \times \text{member}} = \mu_{\text{comment:PR} \times \text{nonmember}}$       | -0.009                                                                                                 | 0.993  | 0.993      |       |   |
|                                                                                                        | $\mu_{\text{post:issue} \times \text{member}} = \mu_{\text{comment:issue} \times \text{member}}$       | -7.624                                                                                                 | 0.000  | 0.000      | ***   |   |
|                                                                                                        | $\mu_{\text{post:issue} \times \text{nonmember}} = \mu_{\text{comment:issue} \times \text{nonmember}}$ | -7.252                                                                                                 | 0.000  | 0.000      | ***   |   |
|                                                                                                        | $\mu_{\text{post:PR} \times \text{member}} = \mu_{\text{comment:PR} \times \text{member}}$             | -8.901                                                                                                 | 0.000  | 0.000      | ***   |   |
|                                                                                                        | $\mu_{\text{post:PR} \times \text{nonmember}} = \mu_{\text{comment:PR} \times \text{nonmember}}$       | 0.626                                                                                                  | 0.532  | 0.639      |       |   |
|                                                                                                        | $\mu_{\text{post:issue} \times \text{member}} = \mu_{\text{post:PR} \times \text{member}}$             | -3.255                                                                                                 | 0.001  | 0.002      | **    |   |
|                                                                                                        | $\mu_{\text{post:issue} \times \text{nonmember}} = \mu_{\text{post:PR} \times \text{nonmember}}$       | -7.981                                                                                                 | 0.000  | 0.000      | ***   |   |
|                                                                                                        | $\mu_{\text{comment:issue} \times \text{member}} = \mu_{\text{comment:PR} \times \text{member}}$       | -4.003                                                                                                 | 0.000  | 0.000      | ***   |   |
|                                                                                                        | $\mu_{\text{comment:issue} \times \text{nonmember}} = \mu_{\text{comment:PR} \times \text{nonmember}}$ | -2.137                                                                                                 | 0.033  | 0.056      | .     |   |
|                                                                                                        | matplotlib                                                                                             | $\mu_{\text{post:issue} \times \text{member}} = \mu_{\text{post:issue} \times \text{nonmember}}$       | -0.933 | 0.351      | 0.449 |   |
|                                                                                                        |                                                                                                        | $\mu_{\text{comment:issue} \times \text{member}} = \mu_{\text{comment:issue} \times \text{nonmember}}$ | -1.965 | 0.049      | 0.080 | . |
| $\mu_{\text{post:PR} \times \text{member}} = \mu_{\text{post:PR} \times \text{nonmember}}$             |                                                                                                        | -0.928                                                                                                 | 0.353  | 0.449      |       |   |
| $\mu_{\text{comment:PR} \times \text{member}} = \mu_{\text{comment:PR} \times \text{nonmember}}$       |                                                                                                        | -1.746                                                                                                 | 0.081  | 0.122      |       |   |
| $\mu_{\text{post:issue} \times \text{member}} = \mu_{\text{comment:issue} \times \text{member}}$       |                                                                                                        | -7.369                                                                                                 | 0.000  | 0.000      | ***   |   |
| $\mu_{\text{post:issue} \times \text{nonmember}} = \mu_{\text{comment:issue} \times \text{nonmember}}$ |                                                                                                        | -9.991                                                                                                 | 0.000  | 0.000      | ***   |   |
| $\mu_{\text{post:PR} \times \text{member}} = \mu_{\text{comment:PR} \times \text{member}}$             |                                                                                                        | -11.454                                                                                                | 0.000  | 0.000      | ***   |   |
| $\mu_{\text{post:PR} \times \text{nonmember}} = \mu_{\text{comment:PR} \times \text{nonmember}}$       |                                                                                                        | -8.945                                                                                                 | 0.000  | 0.000      | ***   |   |
| $\mu_{\text{post:issue} \times \text{member}} = \mu_{\text{post:PR} \times \text{member}}$             |                                                                                                        | -0.556                                                                                                 | 0.578  | 0.674      |       |   |
| $\mu_{\text{post:issue} \times \text{nonmember}} = \mu_{\text{post:PR} \times \text{nonmember}}$       |                                                                                                        | -0.517                                                                                                 | 0.605  | 0.691      |       |   |
| $\mu_{\text{comment:issue} \times \text{member}} = \mu_{\text{comment:PR} \times \text{member}}$       |                                                                                                        | -2.933                                                                                                 | 0.003  | 0.007      | **    |   |
| $\mu_{\text{comment:issue} \times \text{nonmember}} = \mu_{\text{comment:PR} \times \text{nonmember}}$ |                                                                                                        | -2.713                                                                                                 | 0.007  | 0.013      | *     |   |
| $\mu_{\text{post:issue} \times \text{member}} = \mu_{\text{post:issue} \times \text{nonmember}}$       |                                                                                                        | -1.568                                                                                                 | 0.117  | 0.169      |       |   |

Continued on next page

|  |                                                                                                    | t-stat  | p-val. | p-val adj. | sig. |
|--|----------------------------------------------------------------------------------------------------|---------|--------|------------|------|
|  | $\mu_{\text{comment:issue}\times\text{member}} = \mu_{\text{comment:issue}\times\text{nonmember}}$ | -1.406  | 0.160  | 0.229      |      |
|  | $\mu_{\text{post:PR}\times\text{member}} = \mu_{\text{post:PR}\times\text{nonmember}}$             | -0.520  | 0.603  | 0.691      |      |
|  | $\mu_{\text{comment:PR}\times\text{member}} = \mu_{\text{comment:PR}\times\text{nonmember}}$       | -2.075  | 0.038  | 0.063      | .    |
|  | $\mu_{\text{post:issue}\times\text{member}} = \mu_{\text{comment:issue}\times\text{member}}$       | -1.882  | 0.060  | 0.095      | .    |
|  | $\mu_{\text{post:issue}\times\text{nonmember}} = \mu_{\text{comment:issue}\times\text{nonmember}}$ | -2.890  | 0.004  | 0.008      | **   |
|  | $\mu_{\text{post:PR}\times\text{member}} = \mu_{\text{comment:PR}\times\text{member}}$             | -2.279  | 0.023  | 0.041      | *    |
|  | $\mu_{\text{post:PR}\times\text{nonmember}} = \mu_{\text{comment:PR}\times\text{nonmember}}$       | -3.404  | 0.001  | 0.001      | **   |
|  | $\mu_{\text{post:issue}\times\text{member}} = \mu_{\text{post:PR}\times\text{member}}$             | -0.069  | 0.945  | 0.962      |      |
|  | $\mu_{\text{post:issue}\times\text{nonmember}} = \mu_{\text{post:PR}\times\text{nonmember}}$       | 1.071   | 0.284  | 0.378      |      |
|  | $\mu_{\text{comment:issue}\times\text{member}} = \mu_{\text{comment:PR}\times\text{member}}$       | -0.193  | 0.847  | 0.903      |      |
|  | $\mu_{\text{comment:issue}\times\text{nonmember}} = \mu_{\text{comment:PR}\times\text{nonmember}}$ | -1.570  | 0.116  | 0.169      |      |
|  | $\mu_{\text{post:issue}\times\text{member}} = \mu_{\text{post:issue}\times\text{nonmember}}$       | -1.052  | 0.293  | 0.385      |      |
|  | $\mu_{\text{comment:issue}\times\text{member}} = \mu_{\text{comment:issue}\times\text{nonmember}}$ | -5.483  | 0.000  | 0.000      | ***  |
|  | $\mu_{\text{post:PR}\times\text{member}} = \mu_{\text{post:PR}\times\text{nonmember}}$             | -4.700  | 0.000  | 0.000      | ***  |
|  | $\mu_{\text{comment:PR}\times\text{member}} = \mu_{\text{comment:PR}\times\text{nonmember}}$       | 1.397   | 0.162  | 0.229      |      |
|  | $\mu_{\text{post:issue}\times\text{member}} = \mu_{\text{comment:issue}\times\text{member}}$       | -9.886  | 0.000  | 0.000      | ***  |
|  | $\mu_{\text{post:issue}\times\text{nonmember}} = \mu_{\text{comment:issue}\times\text{nonmember}}$ | -15.061 | 0.000  | 0.000      | ***  |
|  | $\mu_{\text{post:PR}\times\text{member}} = \mu_{\text{comment:PR}\times\text{member}}$             | -18.351 | 0.000  | 0.000      | ***  |
|  | $\mu_{\text{post:PR}\times\text{nonmember}} = \mu_{\text{comment:PR}\times\text{nonmember}}$       | -9.050  | 0.000  | 0.000      | ***  |
|  | $\mu_{\text{post:issue}\times\text{member}} = \mu_{\text{post:PR}\times\text{member}}$             | 4.587   | 0.000  | 0.000      | ***  |
|  | $\mu_{\text{post:issue}\times\text{nonmember}} = \mu_{\text{post:PR}\times\text{nonmember}}$       | 0.314   | 0.754  | 0.835      |      |
|  | $\mu_{\text{comment:issue}\times\text{member}} = \mu_{\text{comment:PR}\times\text{member}}$       | -3.839  | 0.000  | 0.000      | ***  |
|  | $\mu_{\text{comment:issue}\times\text{nonmember}} = \mu_{\text{comment:PR}\times\text{nonmember}}$ | 2.691   | 0.007  | 0.014      | *    |
|  | $\mu_{\text{post:issue}\times\text{member}} = \mu_{\text{post:issue}\times\text{nonmember}}$       | -3.035  | 0.002  | 0.005      | **   |
|  | $\mu_{\text{comment:issue}\times\text{member}} = \mu_{\text{comment:issue}\times\text{nonmember}}$ | -5.669  | 0.000  | 0.000      | ***  |
|  | $\mu_{\text{post:PR}\times\text{member}} = \mu_{\text{post:PR}\times\text{nonmember}}$             | -3.921  | 0.000  | 0.000      | ***  |
|  | $\mu_{\text{comment:PR}\times\text{member}} = \mu_{\text{comment:PR}\times\text{nonmember}}$       | -2.119  | 0.034  | 0.057      | .    |

Continued on next page

|                |                                                                                                        | t-stat  | p-val. | p-val adj. | sig. |
|----------------|--------------------------------------------------------------------------------------------------------|---------|--------|------------|------|
|                | $\mu_{\text{post:issue} \times \text{member}} = \mu_{\text{comment:issue} \times \text{member}}$       | -8.790  | 0.000  | 0.000      | ***  |
|                | $\mu_{\text{post:issue} \times \text{nonmember}} = \mu_{\text{comment:issue} \times \text{nonmember}}$ | -11.828 | 0.000  | 0.000      | ***  |
|                | $\mu_{\text{post:PR} \times \text{member}} = \mu_{\text{comment:PR} \times \text{member}}$             | -16.597 | 0.000  | 0.000      | ***  |
|                | $\mu_{\text{post:PR} \times \text{nonmember}} = \mu_{\text{comment:PR} \times \text{nonmember}}$       | -10.357 | 0.000  | 0.000      | ***  |
|                | $\mu_{\text{post:issue} \times \text{member}} = \mu_{\text{post:PR} \times \text{member}}$             | -2.263  | 0.024  | 0.042      | *    |
|                | $\mu_{\text{post:issue} \times \text{nonmember}} = \mu_{\text{post:PR} \times \text{nonmember}}$       | -2.847  | 0.004  | 0.009      | **   |
|                | $\mu_{\text{comment:issue} \times \text{member}} = \mu_{\text{comment:PR} \times \text{member}}$       | -9.017  | 0.000  | 0.000      | ***  |
|                | $\mu_{\text{comment:issue} \times \text{nonmember}} = \mu_{\text{comment:PR} \times \text{nonmember}}$ | -4.262  | 0.000  | 0.000      | ***  |
|                | $\mu_{\text{post:issue} \times \text{member}} = \mu_{\text{post:issue} \times \text{nonmember}}$       | 0.092   | 0.927  | 0.952      |      |
|                | $\mu_{\text{comment:issue} \times \text{member}} = \mu_{\text{comment:issue} \times \text{nonmember}}$ | -2.542  | 0.011  | 0.021      | *    |
|                | $\mu_{\text{post:PR} \times \text{member}} = \mu_{\text{post:PR} \times \text{nonmember}}$             | -0.226  | 0.822  | 0.884      |      |
|                | $\mu_{\text{comment:PR} \times \text{member}} = \mu_{\text{comment:PR} \times \text{nonmember}}$       | 0.480   | 0.631  | 0.713      |      |
|                | $\mu_{\text{post:issue} \times \text{member}} = \mu_{\text{comment:issue} \times \text{member}}$       | -9.899  | 0.000  | 0.000      | ***  |
|                | $\mu_{\text{post:issue} \times \text{nonmember}} = \mu_{\text{comment:issue} \times \text{nonmember}}$ | -13.286 | 0.000  | 0.000      | ***  |
| numpy          | $\mu_{\text{post:PR} \times \text{member}} = \mu_{\text{comment:PR} \times \text{member}}$             | -16.979 | 0.000  | 0.000      | ***  |
|                | $\mu_{\text{post:PR} \times \text{nonmember}} = \mu_{\text{comment:PR} \times \text{nonmember}}$       | -11.678 | 0.000  | 0.000      | ***  |
|                | $\mu_{\text{post:issue} \times \text{member}} = \mu_{\text{post:PR} \times \text{member}}$             | -1.996  | 0.046  | 0.075      | .    |
|                | $\mu_{\text{post:issue} \times \text{nonmember}} = \mu_{\text{post:PR} \times \text{nonmember}}$       | -2.191  | 0.028  | 0.049      | *    |
|                | $\mu_{\text{comment:issue} \times \text{member}} = \mu_{\text{comment:PR} \times \text{member}}$       | -9.492  | 0.000  | 0.000      | ***  |
|                | $\mu_{\text{comment:issue} \times \text{nonmember}} = \mu_{\text{comment:PR} \times \text{nonmember}}$ | -5.002  | 0.000  | 0.000      | ***  |
|                | $\mu_{\text{post:issue} \times \text{member}} = \mu_{\text{post:issue} \times \text{nonmember}}$       | 0.570   | 0.568  | 0.674      |      |
|                | $\mu_{\text{comment:issue} \times \text{member}} = \mu_{\text{comment:issue} \times \text{nonmember}}$ | -0.354  | 0.723  | 0.809      |      |
|                | $\mu_{\text{post:PR} \times \text{member}} = \mu_{\text{post:PR} \times \text{nonmember}}$             | -1.625  | 0.104  | 0.155      |      |
|                | $\mu_{\text{comment:PR} \times \text{member}} = \mu_{\text{comment:PR} \times \text{nonmember}}$       | 0.135   | 0.892  | 0.934      |      |
|                | $\mu_{\text{post:issue} \times \text{member}} = \mu_{\text{comment:issue} \times \text{member}}$       | -3.577  | 0.000  | 0.001      | ***  |
| sphinx-gallery | $\mu_{\text{post:issue} \times \text{nonmember}} = \mu_{\text{comment:issue} \times \text{nonmember}}$ | -4.137  | 0.000  | 0.000      | ***  |
|                | $\mu_{\text{post:PR} \times \text{member}} = \mu_{\text{comment:PR} \times \text{member}}$             | -3.462  | 0.001  | 0.001      | **   |

Continued on next page

---

|                                                                                                        | t-stat | p-val. | p-val adj. | sig. |
|--------------------------------------------------------------------------------------------------------|--------|--------|------------|------|
| $\mu_{\text{post:PR} \times \text{nonmember}} = \mu_{\text{comment:PR} \times \text{nonmember}}$       | -0.182 | 0.856  | 0.904      |      |
| $\mu_{\text{post:issue} \times \text{member}} = \mu_{\text{post:PR} \times \text{member}}$             | -0.298 | 0.766  | 0.840      |      |
| $\mu_{\text{post:issue} \times \text{nonmember}} = \mu_{\text{post:PR} \times \text{nonmember}}$       | -2.216 | 0.027  | 0.047      | *    |
| $\mu_{\text{comment:issue} \times \text{member}} = \mu_{\text{comment:PR} \times \text{member}}$       | 1.224  | 0.221  | 0.297      |      |
| $\mu_{\text{comment:issue} \times \text{nonmember}} = \mu_{\text{comment:PR} \times \text{nonmember}}$ | 1.034  | 0.301  | 0.391      |      |

---

**Supplementary Table 1**

*Results of analyses predicting sentiment score with activity and membership. All p-values adjusted for multiple comparisons using Benjamini-Hochberg. Legend: . =  $p < .10$ ; \* =  $p < .05$ ; \*\* =  $p < .001$ ; \*\*\* =  $p < .0001$*

---

|                                                                                                        |                                                                                                        | t-stat  | p-val. | p-val adj. | sig. |
|--------------------------------------------------------------------------------------------------------|--------------------------------------------------------------------------------------------------------|---------|--------|------------|------|
| Main                                                                                                   | $\mu_{\text{member}} = \mu_{\text{nonmember}}$                                                         | -3.383  | 0.001  | 0.001      | **   |
|                                                                                                        | $\mu_{\text{post:issue}} = \mu_{\text{comment:issue}}$                                                 | -1.619  | 0.105  | 0.135      |      |
|                                                                                                        | $\mu_{\text{post:PR}} = \mu_{\text{comment:PR}}$                                                       | -6.710  | 0.000  | 0.000      | ***  |
|                                                                                                        | $\mu_{\text{post:issue}} = \mu_{\text{post:PR}}$                                                       | 2.418   | 0.016  | 0.022      | *    |
|                                                                                                        | $\mu_{\text{comment:issue}} = \mu_{\text{comment:PR}}$                                                 | -2.671  | 0.008  | 0.011      | *    |
| 2W                                                                                                     | $\mu_{\text{post:issue} \times \text{member}} = \mu_{\text{post:issue} \times \text{nonmember}}$       | -5.139  | 0.000  | 0.000      | ***  |
|                                                                                                        | $\mu_{\text{comment:issue} \times \text{member}} = \mu_{\text{comment:issue} \times \text{nonmember}}$ | -8.616  | 0.000  | 0.000      | ***  |
|                                                                                                        | $\mu_{\text{post:PR} \times \text{member}} = \mu_{\text{post:PR} \times \text{nonmember}}$             | -0.874  | 0.382  | 0.441      |      |
|                                                                                                        | $\mu_{\text{comment:PR} \times \text{member}} = \mu_{\text{comment:PR} \times \text{nonmember}}$       | -1.084  | 0.278  | 0.328      |      |
|                                                                                                        | $\mu_{\text{post:issue} \times \text{member}} = \mu_{\text{comment:issue} \times \text{member}}$       | -2.752  | 0.006  | 0.009      | **   |
|                                                                                                        | $\mu_{\text{post:issue} \times \text{nonmember}} = \mu_{\text{comment:issue} \times \text{nonmember}}$ | -6.083  | 0.000  | 0.000      | ***  |
|                                                                                                        | $\mu_{\text{post:PR} \times \text{member}} = \mu_{\text{comment:PR} \times \text{member}}$             | -8.378  | 0.000  | 0.000      | ***  |
|                                                                                                        | $\mu_{\text{post:PR} \times \text{nonmember}} = \mu_{\text{comment:PR} \times \text{nonmember}}$       | -8.442  | 0.000  | 0.000      | ***  |
|                                                                                                        | $\mu_{\text{post:issue} \times \text{member}} = \mu_{\text{post:PR} \times \text{member}}$             | 0.375   | 0.708  | 0.762      |      |
|                                                                                                        | $\mu_{\text{post:issue} \times \text{nonmember}} = \mu_{\text{post:PR} \times \text{nonmember}}$       | 4.622   | 0.000  | 0.000      | ***  |
|                                                                                                        | $\mu_{\text{comment:issue} \times \text{member}} = \mu_{\text{comment:PR} \times \text{member}}$       | -5.263  | 0.000  | 0.000      | ***  |
| $\mu_{\text{comment:issue} \times \text{nonmember}} = \mu_{\text{comment:PR} \times \text{nonmember}}$ | 2.278                                                                                                  | 0.023   | 0.031  | *          |      |
| scikit-learn                                                                                           | $\mu_{\text{post:issue} \times \text{member}} = \mu_{\text{post:issue} \times \text{nonmember}}$       | -14.666 | 0.000  | 0.000      | ***  |
|                                                                                                        | $\mu_{\text{comment:issue} \times \text{member}} = \mu_{\text{comment:issue} \times \text{nonmember}}$ | -28.530 | 0.000  | 0.000      | ***  |
|                                                                                                        | $\mu_{\text{post:PR} \times \text{member}} = \mu_{\text{post:PR} \times \text{nonmember}}$             | -1.397  | 0.162  | 0.202      |      |
|                                                                                                        | $\mu_{\text{comment:PR} \times \text{member}} = \mu_{\text{comment:PR} \times \text{nonmember}}$       | -10.268 | 0.000  | 0.000      | ***  |
|                                                                                                        | $\mu_{\text{post:issue} \times \text{member}} = \mu_{\text{comment:issue} \times \text{member}}$       | -9.181  | 0.000  | 0.000      | ***  |
|                                                                                                        | $\mu_{\text{post:issue} \times \text{nonmember}} = \mu_{\text{comment:issue} \times \text{nonmember}}$ | -5.942  | 0.000  | 0.000      | ***  |
|                                                                                                        | $\mu_{\text{post:PR} \times \text{member}} = \mu_{\text{comment:PR} \times \text{member}}$             | -22.696 | 0.000  | 0.000      | ***  |
|                                                                                                        | $\mu_{\text{post:PR} \times \text{nonmember}} = \mu_{\text{comment:PR} \times \text{nonmember}}$       | -22.459 | 0.000  | 0.000      | ***  |
|                                                                                                        | $\mu_{\text{post:issue} \times \text{member}} = \mu_{\text{post:PR} \times \text{member}}$             | -1.162  | 0.245  | 0.292      |      |
|                                                                                                        | $\mu_{\text{post:issue} \times \text{nonmember}} = \mu_{\text{post:PR} \times \text{nonmember}}$       | 13.215  | 0.000  | 0.000      | ***  |

Continued on next page

|              |                                                                                                        | t-stat  | p-val. | p-val adj. | sig. |
|--------------|--------------------------------------------------------------------------------------------------------|---------|--------|------------|------|
|              | $\mu_{\text{comment:issue} \times \text{member}} = \mu_{\text{comment:PR} \times \text{member}}$       | -31.005 | 0.000  | 0.000      | ***  |
|              | $\mu_{\text{comment:issue} \times \text{nonmember}} = \mu_{\text{comment:PR} \times \text{nonmember}}$ | -0.071  | 0.944  | 0.952      |      |
|              | $\mu_{\text{post:issue} \times \text{member}} = \mu_{\text{post:issue} \times \text{nonmember}}$       | -5.820  | 0.000  | 0.000      | ***  |
|              | $\mu_{\text{comment:issue} \times \text{member}} = \mu_{\text{comment:issue} \times \text{nonmember}}$ | -10.310 | 0.000  | 0.000      | ***  |
|              | $\mu_{\text{post:PR} \times \text{member}} = \mu_{\text{post:PR} \times \text{nonmember}}$             | -1.363  | 0.173  | 0.212      |      |
|              | $\mu_{\text{comment:PR} \times \text{member}} = \mu_{\text{comment:PR} \times \text{nonmember}}$       | -0.626  | 0.531  | 0.589      |      |
|              | $\mu_{\text{post:issue} \times \text{member}} = \mu_{\text{comment:issue} \times \text{member}}$       | -5.881  | 0.000  | 0.000      | ***  |
|              | $\mu_{\text{post:issue} \times \text{nonmember}} = \mu_{\text{comment:issue} \times \text{nonmember}}$ | -4.413  | 0.000  | 0.000      | ***  |
| scikit-image | $\mu_{\text{post:PR} \times \text{member}} = \mu_{\text{comment:PR} \times \text{member}}$             | -18.886 | 0.000  | 0.000      | ***  |
|              | $\mu_{\text{post:PR} \times \text{nonmember}} = \mu_{\text{comment:PR} \times \text{nonmember}}$       | -10.768 | 0.000  | 0.000      | ***  |
|              | $\mu_{\text{post:issue} \times \text{member}} = \mu_{\text{post:PR} \times \text{member}}$             | -0.247  | 0.805  | 0.842      |      |
|              | $\mu_{\text{post:issue} \times \text{nonmember}} = \mu_{\text{post:PR} \times \text{nonmember}}$       | 4.725   | 0.000  | 0.000      | ***  |
|              | $\mu_{\text{comment:issue} \times \text{member}} = \mu_{\text{comment:PR} \times \text{member}}$       | -16.860 | 0.000  | 0.000      | ***  |
|              | $\mu_{\text{comment:issue} \times \text{nonmember}} = \mu_{\text{comment:PR} \times \text{nonmember}}$ | -0.153  | 0.878  | 0.902      |      |
|              | $\mu_{\text{post:issue} \times \text{member}} = \mu_{\text{post:issue} \times \text{nonmember}}$       | -5.112  | 0.000  | 0.000      | ***  |
|              | $\mu_{\text{comment:issue} \times \text{member}} = \mu_{\text{comment:issue} \times \text{nonmember}}$ | -35.211 | 0.000  | 0.000      | ***  |
|              | $\mu_{\text{post:PR} \times \text{member}} = \mu_{\text{post:PR} \times \text{nonmember}}$             | -1.525  | 0.127  | 0.161      |      |
|              | $\mu_{\text{comment:PR} \times \text{member}} = \mu_{\text{comment:PR} \times \text{nonmember}}$       | -17.307 | 0.000  | 0.000      | ***  |
|              | $\mu_{\text{post:issue} \times \text{member}} = \mu_{\text{comment:issue} \times \text{member}}$       | -0.268  | 0.789  | 0.833      |      |
|              | $\mu_{\text{post:issue} \times \text{nonmember}} = \mu_{\text{comment:issue} \times \text{nonmember}}$ | -15.149 | 0.000  | 0.000      | ***  |
| matplotlib   | $\mu_{\text{post:PR} \times \text{member}} = \mu_{\text{comment:PR} \times \text{member}}$             | -16.944 | 0.000  | 0.000      | ***  |
|              | $\mu_{\text{post:PR} \times \text{nonmember}} = \mu_{\text{comment:PR} \times \text{nonmember}}$       | -16.938 | 0.000  | 0.000      | ***  |
|              | $\mu_{\text{post:issue} \times \text{member}} = \mu_{\text{post:PR} \times \text{member}}$             | 3.528   | 0.000  | 0.001      | ***  |
|              | $\mu_{\text{post:issue} \times \text{nonmember}} = \mu_{\text{post:PR} \times \text{nonmember}}$       | 6.776   | 0.000  | 0.000      | ***  |
|              | $\mu_{\text{comment:issue} \times \text{member}} = \mu_{\text{comment:PR} \times \text{member}}$       | -16.203 | 0.000  | 0.000      | ***  |
|              | $\mu_{\text{comment:issue} \times \text{nonmember}} = \mu_{\text{comment:PR} \times \text{nonmember}}$ | 2.659   | 0.008  | 0.011      | *    |
|              | $\mu_{\text{post:issue} \times \text{member}} = \mu_{\text{post:issue} \times \text{nonmember}}$       | -5.731  | 0.000  | 0.000      | ***  |

Continued on next page



|        |                                                                                                    | t-stat                                                                                       | p-val. | p-val adj. | sig.  |
|--------|----------------------------------------------------------------------------------------------------|----------------------------------------------------------------------------------------------|--------|------------|-------|
|        | $\mu_{\text{comment:issue}\times\text{member}} = \mu_{\text{comment:issue}\times\text{nonmember}}$ | -6.625                                                                                       | 0.000  | 0.000      | ***   |
|        | $\mu_{\text{post:PR}\times\text{member}} = \mu_{\text{post:PR}\times\text{nonmember}}$             | 0.014                                                                                        | 0.989  | 0.989      |       |
|        | $\mu_{\text{comment:PR}\times\text{member}} = \mu_{\text{comment:PR}\times\text{nonmember}}$       | 5.396                                                                                        | 0.000  | 0.000      | ***   |
|        | $\mu_{\text{post:issue}\times\text{member}} = \mu_{\text{comment:issue}\times\text{member}}$       | -3.359                                                                                       | 0.001  | 0.001      | **    |
|        | $\mu_{\text{post:issue}\times\text{nonmember}} = \mu_{\text{comment:issue}\times\text{nonmember}}$ | -0.672                                                                                       | 0.502  | 0.561      |       |
|        | $\mu_{\text{post:PR}\times\text{member}} = \mu_{\text{comment:PR}\times\text{member}}$             | -10.993                                                                                      | 0.000  | 0.000      | ***   |
|        | $\mu_{\text{post:PR}\times\text{nonmember}} = \mu_{\text{comment:PR}\times\text{nonmember}}$       | -3.794                                                                                       | 0.000  | 0.000      | ***   |
|        | $\mu_{\text{post:issue}\times\text{member}} = \mu_{\text{post:PR}\times\text{member}}$             | -0.836                                                                                       | 0.403  | 0.460      |       |
|        | $\mu_{\text{post:issue}\times\text{nonmember}} = \mu_{\text{post:PR}\times\text{nonmember}}$       | 4.967                                                                                        | 0.000  | 0.000      | ***   |
|        | $\mu_{\text{comment:issue}\times\text{member}} = \mu_{\text{comment:PR}\times\text{member}}$       | -10.532                                                                                      | 0.000  | 0.000      | ***   |
|        | $\mu_{\text{comment:issue}\times\text{nonmember}} = \mu_{\text{comment:PR}\times\text{nonmember}}$ | 1.947                                                                                        | 0.052  | 0.069      | .     |
| pandas | $\mu_{\text{post:issue}\times\text{member}} = \mu_{\text{post:issue}\times\text{nonmember}}$       | -11.251                                                                                      | 0.000  | 0.000      | ***   |
|        | $\mu_{\text{comment:issue}\times\text{member}} = \mu_{\text{comment:issue}\times\text{nonmember}}$ | -44.771                                                                                      | 0.000  | 0.000      | ***   |
|        | $\mu_{\text{post:PR}\times\text{member}} = \mu_{\text{post:PR}\times\text{nonmember}}$             | -2.763                                                                                       | 0.006  | 0.009      | **    |
|        | $\mu_{\text{comment:PR}\times\text{member}} = \mu_{\text{comment:PR}\times\text{nonmember}}$       | 9.658                                                                                        | 0.000  | 0.000      | ***   |
|        | $\mu_{\text{post:issue}\times\text{member}} = \mu_{\text{comment:issue}\times\text{member}}$       | -11.531                                                                                      | 0.000  | 0.000      | ***   |
|        | $\mu_{\text{post:issue}\times\text{nonmember}} = \mu_{\text{comment:issue}\times\text{nonmember}}$ | -24.827                                                                                      | 0.000  | 0.000      | ***   |
|        | $\mu_{\text{post:PR}\times\text{member}} = \mu_{\text{comment:PR}\times\text{member}}$             | -34.411                                                                                      | 0.000  | 0.000      | ***   |
|        | $\mu_{\text{post:PR}\times\text{nonmember}} = \mu_{\text{comment:PR}\times\text{nonmember}}$       | -13.474                                                                                      | 0.000  | 0.000      | ***   |
|        | $\mu_{\text{post:issue}\times\text{member}} = \mu_{\text{post:PR}\times\text{member}}$             | 1.225                                                                                        | 0.220  | 0.265      |       |
|        | $\mu_{\text{post:issue}\times\text{nonmember}} = \mu_{\text{post:PR}\times\text{nonmember}}$       | 7.148                                                                                        | 0.000  | 0.000      | ***   |
|        | $\mu_{\text{comment:issue}\times\text{member}} = \mu_{\text{comment:PR}\times\text{member}}$       | -42.608                                                                                      | 0.000  | 0.000      | ***   |
|        | $\mu_{\text{comment:issue}\times\text{nonmember}} = \mu_{\text{comment:PR}\times\text{nonmember}}$ | 21.295                                                                                       | 0.000  | 0.000      | ***   |
|        |                                                                                                    | $\mu_{\text{post:issue}\times\text{member}} = \mu_{\text{post:issue}\times\text{nonmember}}$ | -7.441 | 0.000      | 0.000 |
|        | $\mu_{\text{comment:issue}\times\text{member}} = \mu_{\text{comment:issue}\times\text{nonmember}}$ | -23.611                                                                                      | 0.000  | 0.000      | ***   |
|        | $\mu_{\text{post:PR}\times\text{member}} = \mu_{\text{post:PR}\times\text{nonmember}}$             | -2.325                                                                                       | 0.020  | 0.028      | *     |
|        | $\mu_{\text{comment:PR}\times\text{member}} = \mu_{\text{comment:PR}\times\text{nonmember}}$       | -3.495                                                                                       | 0.000  | 0.001      | ***   |

Continued on next page

|  |                                                                                                    | t-stat  | p-val. | p-val adj. | sig. |
|--|----------------------------------------------------------------------------------------------------|---------|--------|------------|------|
|  | $\mu_{\text{post:issue}\times\text{member}} = \mu_{\text{comment:issue}\times\text{member}}$       | -4.636  | 0.000  | 0.000      | ***  |
|  | $\mu_{\text{post:issue}\times\text{nonmember}} = \mu_{\text{comment:issue}\times\text{nonmember}}$ | -9.932  | 0.000  | 0.000      | ***  |
|  | $\mu_{\text{post:PR}\times\text{member}} = \mu_{\text{comment:PR}\times\text{member}}$             | -25.039 | 0.000  | 0.000      | ***  |
|  | $\mu_{\text{post:PR}\times\text{nonmember}} = \mu_{\text{comment:PR}\times\text{nonmember}}$       | -16.238 | 0.000  | 0.000      | ***  |
|  | $\mu_{\text{post:issue}\times\text{member}} = \mu_{\text{post:PR}\times\text{member}}$             | -0.344  | 0.731  | 0.779      |      |
|  | $\mu_{\text{post:issue}\times\text{nonmember}} = \mu_{\text{post:PR}\times\text{nonmember}}$       | 6.361   | 0.000  | 0.000      | ***  |
|  | $\mu_{\text{comment:issue}\times\text{member}} = \mu_{\text{comment:PR}\times\text{member}}$       | -30.817 | 0.000  | 0.000      | ***  |
|  | $\mu_{\text{comment:issue}\times\text{nonmember}} = \mu_{\text{comment:PR}\times\text{nonmember}}$ | -0.132  | 0.895  | 0.911      |      |
|  | $\mu_{\text{post:issue}\times\text{member}} = \mu_{\text{post:issue}\times\text{nonmember}}$       | -5.873  | 0.000  | 0.000      | ***  |
|  | $\mu_{\text{comment:issue}\times\text{member}} = \mu_{\text{comment:issue}\times\text{nonmember}}$ | -31.858 | 0.000  | 0.000      | ***  |
|  | $\mu_{\text{post:PR}\times\text{member}} = \mu_{\text{post:PR}\times\text{nonmember}}$             | -1.053  | 0.292  | 0.340      |      |
|  | $\mu_{\text{comment:PR}\times\text{member}} = \mu_{\text{comment:PR}\times\text{nonmember}}$       | -5.000  | 0.000  | 0.000      | ***  |
|  | $\mu_{\text{post:issue}\times\text{member}} = \mu_{\text{comment:issue}\times\text{member}}$       | -2.655  | 0.008  | 0.011      | *    |
|  | $\mu_{\text{post:issue}\times\text{nonmember}} = \mu_{\text{comment:issue}\times\text{nonmember}}$ | -14.205 | 0.000  | 0.000      | ***  |
|  | $\mu_{\text{post:PR}\times\text{member}} = \mu_{\text{comment:PR}\times\text{member}}$             | -24.072 | 0.000  | 0.000      | ***  |
|  | $\mu_{\text{post:PR}\times\text{nonmember}} = \mu_{\text{comment:PR}\times\text{nonmember}}$       | -15.473 | 0.000  | 0.000      | ***  |
|  | $\mu_{\text{post:issue}\times\text{member}} = \mu_{\text{post:PR}\times\text{member}}$             | 1.763   | 0.078  | 0.101      |      |
|  | $\mu_{\text{post:issue}\times\text{nonmember}} = \mu_{\text{post:PR}\times\text{nonmember}}$       | 5.998   | 0.000  | 0.000      | ***  |
|  | $\mu_{\text{comment:issue}\times\text{member}} = \mu_{\text{comment:PR}\times\text{member}}$       | -32.582 | 0.000  | 0.000      | ***  |
|  | $\mu_{\text{comment:issue}\times\text{nonmember}} = \mu_{\text{comment:PR}\times\text{nonmember}}$ | 3.773   | 0.000  | 0.000      | ***  |
|  | $\mu_{\text{post:issue}\times\text{member}} = \mu_{\text{post:issue}\times\text{nonmember}}$       | -1.797  | 0.072  | 0.095      | .    |
|  | $\mu_{\text{comment:issue}\times\text{member}} = \mu_{\text{comment:issue}\times\text{nonmember}}$ | -6.165  | 0.000  | 0.000      | ***  |
|  | $\mu_{\text{post:PR}\times\text{member}} = \mu_{\text{post:PR}\times\text{nonmember}}$             | -0.743  | 0.457  | 0.517      |      |
|  | $\mu_{\text{comment:PR}\times\text{member}} = \mu_{\text{comment:PR}\times\text{nonmember}}$       | -0.185  | 0.853  | 0.884      |      |
|  | $\mu_{\text{post:issue}\times\text{member}} = \mu_{\text{comment:issue}\times\text{member}}$       | -0.597  | 0.550  | 0.604      |      |
|  | $\mu_{\text{post:issue}\times\text{nonmember}} = \mu_{\text{comment:issue}\times\text{nonmember}}$ | -2.025  | 0.043  | 0.058      | .    |
|  | $\mu_{\text{post:PR}\times\text{member}} = \mu_{\text{comment:PR}\times\text{member}}$             | -3.992  | 0.000  | 0.000      | ***  |

Continued on next page

---

|                                                                                                        | t-stat | p-val. | p-val adj. | sig. |
|--------------------------------------------------------------------------------------------------------|--------|--------|------------|------|
| $\mu_{\text{post:PR} \times \text{nonmember}} = \mu_{\text{comment:PR} \times \text{nonmember}}$       | -1.480 | 0.139  | 0.174      |      |
| $\mu_{\text{post:issue} \times \text{member}} = \mu_{\text{post:PR} \times \text{member}}$             | 0.518  | 0.605  | 0.657      |      |
| $\mu_{\text{post:issue} \times \text{nonmember}} = \mu_{\text{post:PR} \times \text{nonmember}}$       | 1.241  | 0.215  | 0.261      |      |
| $\mu_{\text{comment:issue} \times \text{member}} = \mu_{\text{comment:PR} \times \text{member}}$       | -4.506 | 0.000  | 0.000      | ***  |
| $\mu_{\text{comment:issue} \times \text{nonmember}} = \mu_{\text{comment:PR} \times \text{nonmember}}$ | 2.577  | 0.010  | 0.014      | *    |

---

### Supplementary Table 2

*Results of analyses predicting log of gratitude count with activity (posted issue [**post:issue**], comment on an issue [**comment:issue**], posted pull request [**post:PR**], or comment on a pull request [**comment:PR**]) and membership (**member** or **nonmember** at time of post). The “Main” results include only the main effects of contribution type and membership. The “2W” results include two-way interaction terms among the main terms. The “3W” results include additional interactions with community membership. All p-values adjusted for multiple comparisons using Benjamini-Hochberg. Legend: . =  $p < .10$ ; \* =  $p < .05$ ; \*\* =  $p < .001$ ; \*\*\* =  $p < .0001$*

---

| Project    | Contrast                         | Year | t-stat | p-val. | p-val adj. | sig. |
|------------|----------------------------------|------|--------|--------|------------|------|
| matplotlib | comment:PR $\times$ member       | 2011 | -2.298 | 0.022  | 0.087      | .    |
|            |                                  | 2012 | -1.525 | 0.127  | 0.309      |      |
|            |                                  | 2013 | -3.082 | 0.002  | 0.018      | *    |
|            |                                  | 2014 | -2.787 | 0.005  | 0.037      | *    |
|            |                                  | 2015 | -5.019 | 0.000  | 0.000      | ***  |
|            |                                  | 2016 | -4.489 | 0.000  | 0.000      | ***  |
|            |                                  | 2017 | -2.416 | 0.016  | 0.073      | .    |
|            |                                  | 2018 | -1.108 | 0.268  | 0.465      |      |
| matplotlib | comment:PR $\times$ nonmember    | 2011 | -1.037 | 0.300  | 0.501      |      |
|            |                                  | 2012 | 1.347  | 0.178  | 0.364      |      |
|            |                                  | 2013 | 0.167  | 0.868  | 0.936      |      |
|            |                                  | 2014 | 0.179  | 0.858  | 0.934      |      |
|            |                                  | 2015 | -1.699 | 0.089  | 0.244      |      |
|            |                                  | 2016 | -2.853 | 0.004  | 0.033      | *    |
|            |                                  | 2017 | -2.803 | 0.005  | 0.036      | *    |
|            |                                  | 2018 | -0.388 | 0.698  | 0.859      |      |
| matplotlib | comment:issue $\times$ member    | 2011 | -4.037 | 0.000  | 0.001      | ***  |
|            |                                  | 2012 | -0.787 | 0.431  | 0.649      |      |
|            |                                  | 2013 | -1.018 | 0.309  | 0.510      |      |
|            |                                  | 2014 | -1.866 | 0.062  | 0.190      |      |
|            |                                  | 2015 | -0.823 | 0.410  | 0.631      |      |
|            |                                  | 2016 | 1.177  | 0.239  | 0.445      |      |
|            |                                  | 2017 | -1.467 | 0.142  | 0.324      |      |
|            |                                  | 2018 | 0.232  | 0.817  | 0.918      |      |
| matplotlib | comment:issue $\times$ nonmember | 2011 | 0.080  | 0.936  | 0.960      |      |
|            |                                  | 2012 | 0.105  | 0.916  | 0.959      |      |
|            |                                  | 2013 | -0.904 | 0.366  | 0.588      |      |

Continued on next page

| Project    | Contrast                   | Year | t-stat | p-val. | p-val adj. | sig. |
|------------|----------------------------|------|--------|--------|------------|------|
|            |                            | 2014 | -3.460 | 0.001  | 0.006      | **   |
|            |                            | 2015 | -1.188 | 0.235  | 0.438      |      |
|            |                            | 2016 | -0.247 | 0.805  | 0.909      |      |
|            |                            | 2017 | -1.737 | 0.082  | 0.235      |      |
|            |                            | 2018 | -1.692 | 0.091  | 0.244      |      |
|            |                            | 2011 | -4.584 | 0.000  | 0.000      | ***  |
|            |                            | 2012 | 1.706  | 0.088  | 0.242      |      |
|            |                            | 2013 | -0.406 | 0.685  | 0.851      |      |
| matplotlib | post:PR $\times$ member    | 2014 | 0.400  | 0.689  | 0.851      |      |
|            |                            | 2015 | -0.114 | 0.909  | 0.959      |      |
|            |                            | 2016 | 1.778  | 0.075  | 0.223      |      |
|            |                            | 2017 | 1.933  | 0.053  | 0.168      |      |
|            |                            | 2018 | 0.721  | 0.471  | 0.692      |      |
|            |                            | 2011 | -1.594 | 0.111  | 0.283      |      |
|            |                            | 2012 | 0.100  | 0.920  | 0.959      |      |
|            |                            | 2013 | -1.412 | 0.158  | 0.340      |      |
| matplotlib | post:PR $\times$ nonmember | 2014 | 1.324  | 0.185  | 0.371      |      |
|            |                            | 2015 | -0.063 | 0.950  | 0.970      |      |
|            |                            | 2016 | -0.663 | 0.508  | 0.723      |      |
|            |                            | 2017 | -0.623 | 0.534  | 0.748      |      |
|            |                            | 2018 | -1.625 | 0.104  | 0.272      |      |
|            |                            | 2011 | 2.097  | 0.036  | 0.131      |      |
|            |                            | 2012 | -2.359 | 0.018  | 0.081      | .    |
|            |                            | 2013 | -3.170 | 0.002  | 0.015      | *    |
| matplotlib | post:issue $\times$ member | 2014 | -0.077 | 0.938  | 0.960      |      |
|            |                            | 2015 | 2.562  | 0.010  | 0.054      | .    |
|            |                            | 2016 | 1.964  | 0.050  | 0.165      |      |

Continued on next page

| Project    | Contrast               | Year | t-stat | p-val. | p-val adj. | sig. |
|------------|------------------------|------|--------|--------|------------|------|
| matplotlib | post:issue × nonmember | 2017 | -1.435 | 0.151  | 0.334      |      |
|            |                        | 2018 | -2.649 | 0.008  | 0.047      | *    |
|            |                        | 2011 | -1.233 | 0.218  | 0.419      |      |
|            |                        | 2012 | 1.418  | 0.156  | 0.339      |      |
|            |                        | 2013 | 1.510  | 0.131  | 0.312      |      |
|            |                        | 2014 | -1.227 | 0.220  | 0.422      |      |
|            |                        | 2015 | 2.627  | 0.009  | 0.048      | *    |
|            |                        | 2016 | 1.437  | 0.151  | 0.334      |      |
|            |                        | 2017 | -2.051 | 0.040  | 0.139      |      |
|            |                        | 2018 | -1.169 | 0.242  | 0.445      |      |
| mayavi     | comment:PR × member    | 2013 | -1.021 | 0.307  | 0.510      |      |
|            |                        | 2014 | -2.466 | 0.014  | 0.068      | .    |
|            |                        | 2015 | -2.357 | 0.018  | 0.081      | .    |
|            |                        | 2016 | -2.317 | 0.020  | 0.085      | .    |
|            |                        | 2017 | -0.602 | 0.547  | 0.759      |      |
|            |                        | 2018 | -1.727 | 0.084  | 0.237      |      |
| mayavi     | comment:PR × nonmember | 2011 | 0.692  | 0.489  | 0.707      |      |
|            |                        | 2012 | -0.214 | 0.831  | 0.925      |      |
|            |                        | 2013 | 1.112  | 0.266  | 0.465      |      |
|            |                        | 2014 | -2.745 | 0.006  | 0.041      | *    |
|            |                        | 2015 | -0.324 | 0.746  | 0.886      |      |
|            |                        | 2016 | 0.454  | 0.650  | 0.829      |      |
|            |                        | 2017 | -0.353 | 0.724  | 0.880      |      |
|            |                        | 2018 | 0.702  | 0.483  | 0.705      |      |
| mayavi     | comment:issue × member | 2012 | 1.027  | 0.305  | 0.508      |      |
|            |                        | 2013 | -1.110 | 0.267  | 0.465      |      |
|            |                        | 2014 | -1.937 | 0.053  | 0.168      |      |

Continued on next page

| Project | Contrast                         | Year | t-stat | p-val. | p-val adj. | sig. |
|---------|----------------------------------|------|--------|--------|------------|------|
|         |                                  | 2015 | -0.429 | 0.668  | 0.844      |      |
|         |                                  | 2016 | -0.424 | 0.672  | 0.844      |      |
|         |                                  | 2017 | -2.689 | 0.007  | 0.045      | *    |
|         |                                  | 2018 | -3.807 | 0.000  | 0.002      | **   |
|         |                                  | 2011 | -2.576 | 0.010  | 0.052      | .    |
|         |                                  | 2012 | -2.591 | 0.010  | 0.052      | .    |
|         |                                  | 2013 | -1.004 | 0.315  | 0.517      |      |
|         |                                  | 2014 | 0.275  | 0.783  | 0.895      |      |
| mayavi  | comment:issue $\times$ nonmember | 2015 | -2.269 | 0.023  | 0.091      | .    |
|         |                                  | 2016 | -0.533 | 0.594  | 0.782      |      |
|         |                                  | 2017 | -2.559 | 0.010  | 0.054      | .    |
|         |                                  | 2018 | -0.174 | 0.862  | 0.934      |      |
|         |                                  | 2013 | -0.680 | 0.497  | 0.714      |      |
|         |                                  | 2014 | -2.146 | 0.032  | 0.120      |      |
|         |                                  | 2015 | -0.232 | 0.817  | 0.918      |      |
| mayavi  | post:PR $\times$ member          | 2016 | -0.454 | 0.650  | 0.829      |      |
|         |                                  | 2017 | -1.760 | 0.078  | 0.228      |      |
|         |                                  | 2018 | -2.604 | 0.009  | 0.051      | .    |
|         |                                  | 2011 | -1.306 | 0.192  | 0.380      |      |
|         |                                  | 2012 | -1.419 | 0.156  | 0.339      |      |
|         |                                  | 2013 | -1.172 | 0.241  | 0.445      |      |
|         |                                  | 2014 | -0.746 | 0.455  | 0.671      |      |
| mayavi  | post:PR $\times$ nonmember       | 2015 | 0.522  | 0.602  | 0.789      |      |
|         |                                  | 2016 | 0.670  | 0.503  | 0.721      |      |
|         |                                  | 2017 | -1.579 | 0.114  | 0.288      |      |
|         |                                  | 2018 | -1.051 | 0.293  | 0.492      |      |
|         |                                  | 2013 | -0.017 | 0.986  | 0.992      |      |

Continued on next page

|        |                            |
|--------|----------------------------|
| mayavi | post:issue $\times$ member |
|--------|----------------------------|

| Project | Contrast                      | Year | t-stat | p-val. | p-val adj. | sig. |
|---------|-------------------------------|------|--------|--------|------------|------|
|         |                               | 2015 | -0.756 | 0.450  | 0.668      |      |
|         |                               | 2016 | -1.354 | 0.176  | 0.364      |      |
|         |                               | 2017 | 1.489  | 0.137  | 0.316      |      |
|         |                               | 2018 | -2.442 | 0.015  | 0.069      | .    |
|         |                               | 2011 | -0.660 | 0.509  | 0.723      |      |
|         |                               | 2012 | -0.542 | 0.588  | 0.782      |      |
|         |                               | 2013 | 2.327  | 0.020  | 0.084      | .    |
| mayavi  | post:issue $\times$ nonmember | 2014 | 0.540  | 0.590  | 0.782      |      |
|         |                               | 2015 | 0.517  | 0.605  | 0.790      |      |
|         |                               | 2016 | -1.944 | 0.052  | 0.168      |      |
|         |                               | 2017 | -1.292 | 0.196  | 0.386      |      |
|         |                               | 2018 | -0.328 | 0.743  | 0.886      |      |
|         |                               | 2010 | 0.534  | 0.594  | 0.782      |      |
|         |                               | 2011 | -1.890 | 0.059  | 0.183      |      |
|         |                               | 2012 | -6.185 | 0.000  | 0.000      | ***  |
|         |                               | 2013 | 0.750  | 0.453  | 0.670      |      |
| numpy   | comment:PR $\times$ member    | 2014 | -0.106 | 0.916  | 0.959      |      |
|         |                               | 2015 | 1.631  | 0.103  | 0.270      |      |
|         |                               | 2016 | 1.719  | 0.086  | 0.240      |      |
|         |                               | 2017 | 1.096  | 0.273  | 0.471      |      |
|         |                               | 2018 | 0.534  | 0.593  | 0.782      |      |
|         |                               | 2010 | -2.405 | 0.016  | 0.073      | .    |
|         |                               | 2011 | 0.406  | 0.685  | 0.851      |      |
|         |                               | 2012 | -1.495 | 0.135  | 0.314      |      |
|         |                               | 2013 | -1.458 | 0.145  | 0.328      |      |
| numpy   | comment:PR $\times$ nonmember | 2014 | -0.782 | 0.434  | 0.650      |      |
|         |                               | 2015 | -0.281 | 0.779  | 0.895      |      |

Continued on next page



| Project | Contrast                         | Year | t-stat | p-val. | p-val adj. | sig. |
|---------|----------------------------------|------|--------|--------|------------|------|
|         |                                  | 2016 | 1.413  | 0.158  | 0.340      |      |
|         |                                  | 2017 | -0.464 | 0.643  | 0.825      |      |
|         |                                  | 2018 | -0.353 | 0.724  | 0.880      |      |
|         |                                  | 2012 | -4.460 | 0.000  | 0.000      | ***  |
|         |                                  | 2013 | -3.057 | 0.002  | 0.019      | *    |
|         |                                  | 2014 | -3.937 | 0.000  | 0.001      | **   |
| numpy   | comment:issue $\times$ member    | 2015 | 0.840  | 0.401  | 0.621      |      |
|         |                                  | 2016 | -2.341 | 0.019  | 0.083      | .    |
|         |                                  | 2017 | -7.722 | 0.000  | 0.000      | ***  |
|         |                                  | 2018 | -3.469 | 0.001  | 0.006      | **   |
|         |                                  | 2012 | -2.923 | 0.003  | 0.027      | *    |
|         |                                  | 2013 | -2.628 | 0.009  | 0.048      | *    |
|         |                                  | 2014 | -2.446 | 0.014  | 0.069      | .    |
| numpy   | comment:issue $\times$ nonmember | 2015 | -2.438 | 0.015  | 0.069      | .    |
|         |                                  | 2016 | -0.876 | 0.381  | 0.603      |      |
|         |                                  | 2017 | -1.366 | 0.172  | 0.363      |      |
|         |                                  | 2018 | -3.461 | 0.001  | 0.006      | **   |
|         |                                  | 2010 | 2.574  | 0.010  | 0.052      | .    |
|         |                                  | 2011 | -0.183 | 0.854  | 0.934      |      |
|         |                                  | 2012 | -3.401 | 0.001  | 0.007      | **   |
|         |                                  | 2013 | -1.886 | 0.059  | 0.184      |      |
| numpy   | post:PR $\times$ member          | 2014 | -0.784 | 0.433  | 0.649      |      |
|         |                                  | 2015 | -0.179 | 0.858  | 0.934      |      |
|         |                                  | 2016 | -1.528 | 0.127  | 0.308      |      |
|         |                                  | 2017 | -1.084 | 0.278  | 0.472      |      |
|         |                                  | 2018 | -0.343 | 0.732  | 0.882      |      |
|         |                                  | 2010 | 0.121  | 0.903  | 0.959      |      |

Continued on next page

| Project | Contrast                      | Year | t-stat | p-val. | p-val adj. | sig. |
|---------|-------------------------------|------|--------|--------|------------|------|
|         |                               | 2011 | -0.282 | 0.778  | 0.895      |      |
|         |                               | 2012 | -2.133 | 0.033  | 0.123      |      |
|         |                               | 2013 | 0.007  | 0.994  | 0.998      |      |
|         |                               | 2014 | -1.619 | 0.105  | 0.273      |      |
|         |                               | 2015 | -1.945 | 0.052  | 0.168      |      |
|         |                               | 2016 | -1.077 | 0.282  | 0.474      |      |
|         |                               | 2017 | -2.804 | 0.005  | 0.036      | *    |
|         |                               | 2018 | -2.678 | 0.007  | 0.045      | *    |
|         |                               | 2012 | -3.269 | 0.001  | 0.011      | *    |
|         |                               | 2013 | -0.661 | 0.508  | 0.723      |      |
|         |                               | 2014 | -1.714 | 0.087  | 0.241      |      |
| numpy   | post:issue $\times$ member    | 2015 | -1.084 | 0.278  | 0.472      |      |
|         |                               | 2016 | -3.548 | 0.000  | 0.005      | **   |
|         |                               | 2017 | -2.687 | 0.007  | 0.045      | *    |
|         |                               | 2018 | -1.486 | 0.137  | 0.316      |      |
|         |                               | 2012 | -1.510 | 0.131  | 0.312      |      |
|         |                               | 2013 | -2.802 | 0.005  | 0.036      | *    |
|         |                               | 2014 | -1.695 | 0.090  | 0.244      |      |
| numpy   | post:issue $\times$ nonmember | 2015 | -1.959 | 0.050  | 0.166      |      |
|         |                               | 2016 | -3.559 | 0.000  | 0.005      | **   |
|         |                               | 2017 | -2.059 | 0.039  | 0.137      |      |
|         |                               | 2018 | -3.882 | 0.000  | 0.002      | **   |
|         |                               | 2011 | 1.590  | 0.112  | 0.284      |      |
|         |                               | 2012 | -0.193 | 0.847  | 0.934      |      |
|         |                               | 2013 | -8.065 | 0.000  | 0.000      | ***  |
|         |                               | 2014 | -1.612 | 0.107  | 0.276      |      |
| pandas  | comment:PR $\times$ member    | 2015 | 1.004  | 0.315  | 0.517      |      |

Continued on next page

| Project | Contrast                         | Year                          | t-stat | p-val. | p-val adj. | sig.  |
|---------|----------------------------------|-------------------------------|--------|--------|------------|-------|
| pandas  |                                  | 2016                          | -1.500 | 0.134  | 0.314      |       |
|         |                                  | 2017                          | -1.081 | 0.280  | 0.473      |       |
|         |                                  | 2018                          | -1.146 | 0.252  | 0.453      |       |
|         | comment:PR $\times$ nonmember    | 2011                          | 1.317  | 0.188  | 0.374      |       |
|         |                                  | 2012                          | 0.325  | 0.745  | 0.886      |       |
|         |                                  | 2013                          | -1.115 | 0.265  | 0.465      |       |
|         |                                  | 2014                          | -2.263 | 0.024  | 0.092      | .     |
|         |                                  | 2015                          | -1.168 | 0.243  | 0.445      |       |
|         |                                  | 2016                          | -2.937 | 0.003  | 0.027      | *     |
|         |                                  | 2017                          | -1.644 | 0.100  | 0.266      |       |
|         |                                  | 2018                          | -7.995 | 0.000  | 0.000      | ***   |
|         |                                  | comment:issue $\times$ member | 2010   | 0.399  | 0.690      | 0.851 |
|         | 2011                             |                               | 1.776  | 0.076  | 0.223      |       |
|         | 2012                             |                               | -1.867 | 0.062  | 0.190      |       |
|         | 2013                             |                               | 0.274  | 0.784  | 0.895      |       |
| 2014    | 2.786                            |                               | 0.005  | 0.037  | *          |       |
| 2015    | 0.156                            |                               | 0.876  | 0.941  |            |       |
| 2016    | -1.158                           |                               | 0.247  | 0.449  |            |       |
| 2017    | 3.265                            |                               | 0.001  | 0.011  | *          |       |
| 2018    | 1.970                            |                               | 0.049  | 0.165  |            |       |
| pandas  | comment:issue $\times$ nonmember | 2010                          | 1.224  | 0.221  | 0.422      |       |
|         |                                  | 2011                          | 0.828  | 0.408  | 0.629      |       |
|         |                                  | 2012                          | 2.873  | 0.004  | 0.031      | *     |
|         |                                  | 2013                          | 5.223  | 0.000  | 0.000      | ***   |
|         |                                  | 2014                          | 4.586  | 0.000  | 0.000      | ***   |
|         |                                  | 2015                          | 1.085  | 0.278  | 0.472      |       |
|         |                                  | 2016                          | 0.042  | 0.967  | 0.983      |       |

Continued on next page

| Project | Contrast            | Year  | t-stat | p-val. | p-val adj. | sig. |
|---------|---------------------|-------|--------|--------|------------|------|
| pandas  | post:PR × member    | 2017  | 0.158  | 0.874  | 0.941      |      |
|         |                     | 2018  | -1.502 | 0.133  | 0.314      |      |
|         |                     | 2011  | -0.275 | 0.783  | 0.895      |      |
|         |                     | 2012  | -2.101 | 0.036  | 0.130      |      |
|         |                     | 2013  | -1.428 | 0.153  | 0.338      |      |
|         |                     | 2014  | -0.320 | 0.749  | 0.886      |      |
|         |                     | 2015  | -2.282 | 0.022  | 0.089      | .    |
|         |                     | 2016  | -2.649 | 0.008  | 0.047      | *    |
|         |                     | 2017  | -1.336 | 0.181  | 0.367      |      |
|         |                     | 2018  | -0.998 | 0.318  | 0.520      |      |
| pandas  | post:PR × nonmember | 2011  | 0.593  | 0.553  | 0.763      |      |
|         |                     | 2012  | -0.103 | 0.918  | 0.959      |      |
|         |                     | 2013  | -0.709 | 0.478  | 0.700      |      |
|         |                     | 2014  | -2.064 | 0.039  | 0.137      |      |
|         |                     | 2015  | -0.547 | 0.584  | 0.782      |      |
|         |                     | 2016  | -3.019 | 0.003  | 0.021      | *    |
|         |                     | 2017  | -2.687 | 0.007  | 0.045      | *    |
|         |                     | 2018  | 4.684  | 0.000  | 0.000      | ***  |
| pandas  | post:issue × member | 2010  | 0.579  | 0.563  | 0.769      |      |
|         |                     | 2011  | -2.248 | 0.025  | 0.095      | .    |
|         |                     | 2012  | 0.260  | 0.795  | 0.901      |      |
|         |                     | 2013  | 3.227  | 0.001  | 0.012      | *    |
|         |                     | 2014  | 3.116  | 0.002  | 0.017      | *    |
|         |                     | 2015  | 0.137  | 0.891  | 0.949      |      |
|         |                     | 2016  | 2.697  | 0.007  | 0.045      | *    |
|         |                     | 2017  | 3.436  | 0.001  | 0.007      | **   |
| 2018    | 3.916               | 0.000 | 0.001  | **     |            |      |

Continued on next page

| Project      | Contrast                      | Year | t-stat | p-val. | p-val adj. | sig. |
|--------------|-------------------------------|------|--------|--------|------------|------|
| pandas       | post:issue $\times$ nonmember | 2010 | 0.002  | 0.998  | 0.999      |      |
|              |                               | 2011 | 1.199  | 0.230  | 0.432      |      |
|              |                               | 2012 | 2.065  | 0.039  | 0.137      |      |
|              |                               | 2013 | 0.513  | 0.608  | 0.791      |      |
|              |                               | 2014 | 0.651  | 0.515  | 0.729      |      |
|              |                               | 2015 | -0.585 | 0.559  | 0.769      |      |
|              |                               | 2016 | 4.027  | 0.000  | 0.001      | ***  |
|              |                               | 2017 | 3.563  | 0.000  | 0.005      | **   |
| scikit-image | comment:PR $\times$ member    | 2011 | 0.263  | 0.793  | 0.901      |      |
|              |                               | 2012 | 1.426  | 0.154  | 0.338      |      |
|              |                               | 2013 | 2.952  | 0.003  | 0.026      | *    |
|              |                               | 2014 | 1.746  | 0.081  | 0.232      |      |
|              |                               | 2015 | 2.706  | 0.007  | 0.045      | *    |
|              |                               | 2016 | 1.760  | 0.078  | 0.228      |      |
|              |                               | 2017 | 2.340  | 0.019  | 0.083      | .    |
|              |                               | 2018 | 0.841  | 0.401  | 0.621      |      |
| scikit-image | comment:PR $\times$ nonmember | 2011 | 1.269  | 0.205  | 0.398      |      |
|              |                               | 2012 | -1.509 | 0.131  | 0.312      |      |
|              |                               | 2013 | 0.914  | 0.361  | 0.581      |      |
|              |                               | 2014 | 1.709  | 0.087  | 0.242      |      |
|              |                               | 2015 | -1.380 | 0.168  | 0.358      |      |
|              |                               | 2016 | 1.921  | 0.055  | 0.172      |      |
|              |                               | 2017 | 5.540  | 0.000  | 0.000      | ***  |
|              |                               | 2018 | 6.461  | 0.000  | 0.000      | ***  |
| scikit-image | comment:issue $\times$ member | 2011 | 0.404  | 0.686  | 0.851      |      |
|              |                               | 2012 | 0.224  | 0.823  | 0.920      |      |

Continued on next page

scikit-image comment:issue  $\times$  member

| Project      | Contrast                         | Year | t-stat | p-val. | p-val adj. | sig. |
|--------------|----------------------------------|------|--------|--------|------------|------|
|              |                                  | 2013 | -0.108 | 0.914  | 0.959      |      |
|              |                                  | 2014 | -1.250 | 0.211  | 0.409      |      |
|              |                                  | 2015 | 2.118  | 0.034  | 0.126      |      |
|              |                                  | 2016 | 0.200  | 0.842  | 0.934      |      |
|              |                                  | 2017 | 2.379  | 0.017  | 0.078      | .    |
|              |                                  | 2018 | 2.491  | 0.013  | 0.064      | .    |
|              |                                  | 2011 | -0.424 | 0.672  | 0.844      |      |
|              |                                  | 2012 | -0.694 | 0.488  | 0.707      |      |
|              |                                  | 2013 | -0.857 | 0.392  | 0.613      |      |
|              |                                  | 2014 | 0.018  | 0.986  | 0.992      |      |
| scikit-image | comment:issue $\times$ nonmember | 2015 | 1.125  | 0.261  | 0.465      |      |
|              |                                  | 2016 | -0.445 | 0.657  | 0.836      |      |
|              |                                  | 2017 | 0.877  | 0.381  | 0.603      |      |
|              |                                  | 2018 | 2.315  | 0.021  | 0.085      | .    |
|              |                                  | 2011 | -1.567 | 0.117  | 0.293      |      |
|              |                                  | 2012 | -1.446 | 0.148  | 0.334      |      |
|              |                                  | 2013 | 0.374  | 0.708  | 0.867      |      |
|              |                                  | 2014 | -1.168 | 0.243  | 0.445      |      |
| scikit-image | post:PR $\times$ member          | 2015 | 0.089  | 0.929  | 0.959      |      |
|              |                                  | 2016 | 0.597  | 0.551  | 0.762      |      |
|              |                                  | 2017 | 2.404  | 0.016  | 0.073      | .    |
|              |                                  | 2018 | 6.409  | 0.000  | 0.000      | ***  |
|              |                                  | 2011 | 0.564  | 0.573  | 0.781      |      |
|              |                                  | 2012 | -0.091 | 0.927  | 0.959      |      |
|              |                                  | 2013 | 2.327  | 0.020  | 0.084      | .    |
|              |                                  | 2014 | 0.753  | 0.452  | 0.669      |      |
| scikit-image | post:PR $\times$ nonmember       | 2015 | 1.214  | 0.225  | 0.426      |      |

Continued on next page

| Project      | Contrast                      | Year | t-stat | p-val. | p-val adj. | sig. |
|--------------|-------------------------------|------|--------|--------|------------|------|
|              |                               | 2016 | 5.060  | 0.000  | 0.000      | ***  |
|              |                               | 2017 | 8.701  | 0.000  | 0.000      | ***  |
|              |                               | 2018 | 6.175  | 0.000  | 0.000      | ***  |
|              |                               | 2011 | 0.275  | 0.783  | 0.895      |      |
|              |                               | 2012 | -2.034 | 0.042  | 0.144      |      |
|              |                               | 2013 | -1.594 | 0.111  | 0.283      |      |
|              |                               | 2014 | -1.821 | 0.069  | 0.206      |      |
| scikit-image | post:issue $\times$ member    | 2015 | -0.646 | 0.518  | 0.732      |      |
|              |                               | 2016 | -2.670 | 0.008  | 0.045      | *    |
|              |                               | 2017 | -1.345 | 0.178  | 0.364      |      |
|              |                               | 2018 | 1.344  | 0.179  | 0.364      |      |
|              |                               | 2011 | 0.187  | 0.851  | 0.934      |      |
|              |                               | 2012 | -2.148 | 0.032  | 0.120      |      |
|              |                               | 2013 | -0.619 | 0.536  | 0.748      |      |
|              |                               | 2014 | 0.554  | 0.580  | 0.782      |      |
| scikit-image | post:issue $\times$ nonmember | 2015 | 1.164  | 0.245  | 0.446      |      |
|              |                               | 2016 | -1.088 | 0.277  | 0.472      |      |
|              |                               | 2017 | -1.276 | 0.202  | 0.396      |      |
|              |                               | 2018 | -0.469 | 0.639  | 0.823      |      |
|              |                               | 2010 | -0.540 | 0.590  | 0.782      |      |
|              |                               | 2011 | 2.405  | 0.016  | 0.073      | .    |
|              |                               | 2012 | 4.203  | 0.000  | 0.000      | ***  |
|              |                               | 2013 | 5.497  | 0.000  | 0.000      | ***  |
| scikit-learn | comment:PR $\times$ member    | 2014 | 3.418  | 0.001  | 0.007      | **   |
|              |                               | 2015 | -2.091 | 0.037  | 0.132      |      |
|              |                               | 2016 | -1.540 | 0.124  | 0.305      |      |
|              |                               | 2017 | 0.112  | 0.911  | 0.959      |      |

Continued on next page

| Project      | Contrast               | Year         | t-stat                    | p-val. | p-val adj. | sig.  |
|--------------|------------------------|--------------|---------------------------|--------|------------|-------|
| scikit-learn | comment:PR × nonmember | 2018         | -0.856                    | 0.392  | 0.613      |       |
|              |                        | 2010         | 2.447                     | 0.014  | 0.069      | .     |
|              |                        | 2011         | -0.917                    | 0.359  | 0.581      |       |
|              |                        | 2012         | -0.172                    | 0.864  | 0.934      |       |
|              |                        | 2013         | 1.794                     | 0.073  | 0.217      |       |
|              |                        | 2014         | 1.533                     | 0.125  | 0.307      |       |
|              |                        | 2015         | 0.311                     | 0.756  | 0.889      |       |
|              |                        | 2016         | 1.121                     | 0.262  | 0.465      |       |
|              |                        | 2017         | -1.654                    | 0.098  | 0.262      |       |
|              |                        | 2018         | 3.284                     | 0.001  | 0.011      | *     |
| scikit-learn | comment:issue × member | 2010         | -0.333                    | 0.739  | 0.886      |       |
|              |                        | 2011         | 1.578                     | 0.115  | 0.288      |       |
|              |                        | 2012         | 3.985                     | 0.000  | 0.001      | **    |
|              |                        | 2013         | 2.317                     | 0.020  | 0.085      | .     |
|              |                        | 2014         | -0.273                    | 0.785  | 0.895      |       |
|              |                        | 2015         | -2.754                    | 0.006  | 0.040      | *     |
|              |                        | 2016         | 0.343                     | 0.731  | 0.882      |       |
|              |                        | 2017         | 1.951                     | 0.051  | 0.168      |       |
|              |                        | 2018         | -0.370                    | 0.711  | 0.868      |       |
|              |                        | scikit-learn | comment:issue × nonmember | 2010   | -1.137     | 0.256 |
| 2011         | 0.691                  |              |                           | 0.489  | 0.707      |       |
| 2012         | -0.279                 |              |                           | 0.780  | 0.895      |       |
| 2013         | -2.286                 |              |                           | 0.022  | 0.089      | .     |
| 2014         | -1.106                 |              |                           | 0.269  | 0.465      |       |
| 2015         | -0.608                 |              |                           | 0.543  | 0.756      |       |
| 2016         | 0.787                  |              |                           | 0.432  | 0.649      |       |
| 2017         | 1.404                  |              |                           | 0.160  | 0.343      |       |

Continued on next page



| Project      | Contrast                   | Year | t-stat | p-val. | p-val adj. | sig. |
|--------------|----------------------------|------|--------|--------|------------|------|
| scikit-learn | post:PR $\times$ member    | 2018 | 2.801  | 0.005  | 0.036      | *    |
|              |                            | 2010 | -2.585 | 0.010  | 0.052      | .    |
|              |                            | 2011 | 5.644  | 0.000  | 0.000      | ***  |
|              |                            | 2012 | 3.036  | 0.002  | 0.021      | *    |
|              |                            | 2013 | 3.852  | 0.000  | 0.002      | **   |
|              |                            | 2014 | 2.599  | 0.009  | 0.051      | .    |
|              |                            | 2015 | 1.270  | 0.204  | 0.398      |      |
|              |                            | 2016 | 0.620  | 0.535  | 0.748      |      |
|              |                            | 2017 | -0.349 | 0.727  | 0.882      |      |
|              |                            | 2018 | -2.462 | 0.014  | 0.068      | .    |
| scikit-learn | post:PR $\times$ nonmember | 2010 | -0.092 | 0.926  | 0.959      |      |
|              |                            | 2011 | 0.400  | 0.689  | 0.851      |      |
|              |                            | 2012 | 2.667  | 0.008  | 0.045      | *    |
|              |                            | 2013 | 0.894  | 0.371  | 0.594      |      |
|              |                            | 2014 | 1.351  | 0.177  | 0.364      |      |
|              |                            | 2015 | -0.881 | 0.379  | 0.603      |      |
|              |                            | 2016 | 1.110  | 0.267  | 0.465      |      |
|              |                            | 2017 | 0.175  | 0.861  | 0.934      |      |
|              |                            | 2018 | -5.046 | 0.000  | 0.000      | ***  |
|              |                            | 2010 | -0.490 | 0.624  | 0.810      |      |
| scikit-learn | post:issue $\times$ member | 2011 | 0.305  | 0.761  | 0.891      |      |
|              |                            | 2012 | 2.072  | 0.038  | 0.136      |      |
|              |                            | 2013 | -0.322 | 0.747  | 0.886      |      |
|              |                            | 2014 | -1.367 | 0.172  | 0.363      |      |
|              |                            | 2015 | -0.950 | 0.342  | 0.557      |      |
|              |                            | 2016 | 0.810  | 0.418  | 0.641      |      |
|              |                            | 2017 | 1.938  | 0.053  | 0.168      |      |

Continued on next page

| Project      | Contrast                      | Year | t-stat | p-val. | p-val adj. | sig. |
|--------------|-------------------------------|------|--------|--------|------------|------|
| scikit-learn | post:issue $\times$ nonmember | 2018 | -1.752 | 0.080  | 0.231      |      |
|              |                               | 2010 | 0.096  | 0.923  | 0.959      |      |
|              |                               | 2011 | 0.274  | 0.784  | 0.895      |      |
|              |                               | 2012 | -1.935 | 0.053  | 0.168      |      |
|              |                               | 2013 | 0.137  | 0.891  | 0.949      |      |
|              |                               | 2014 | 1.706  | 0.088  | 0.242      |      |
|              |                               | 2015 | 0.550  | 0.582  | 0.782      |      |
|              |                               | 2016 | -1.639 | 0.101  | 0.267      |      |
|              |                               | 2017 | -0.429 | 0.668  | 0.844      |      |
|              |                               | 2018 | 2.450  | 0.014  | 0.069      | .    |
| scipy        | comment:PR $\times$ member    | 2011 | 0.470  | 0.638  | 0.823      |      |
|              |                               | 2012 | -0.080 | 0.936  | 0.960      |      |
|              |                               | 2013 | 6.321  | 0.000  | 0.000      | ***  |
|              |                               | 2014 | -0.550 | 0.582  | 0.782      |      |
|              |                               | 2015 | 5.066  | 0.000  | 0.000      | ***  |
|              |                               | 2016 | 7.714  | 0.000  | 0.000      | ***  |
|              |                               | 2017 | 1.327  | 0.185  | 0.371      |      |
|              |                               | 2018 | 2.964  | 0.003  | 0.025      | *    |
| scipy        | comment:PR $\times$ nonmember | 2011 | 0.550  | 0.582  | 0.782      |      |
|              |                               | 2012 | 1.331  | 0.183  | 0.370      |      |
|              |                               | 2013 | -0.019 | 0.985  | 0.992      |      |
|              |                               | 2014 | 0.864  | 0.387  | 0.610      |      |
|              |                               | 2015 | 4.199  | 0.000  | 0.000      | ***  |
|              |                               | 2016 | 2.335  | 0.020  | 0.084      | .    |
|              |                               | 2017 | 1.538  | 0.124  | 0.305      |      |
|              |                               | 2018 | 4.730  | 0.000  | 0.000      | ***  |
|              |                               | 2013 | -1.298 | 0.194  | 0.384      |      |

Continued on next page

scipy comment:issue  $\times$  member

| Project | Contrast                         | Year | t-stat | p-val. | p-val adj. | sig. |
|---------|----------------------------------|------|--------|--------|------------|------|
|         |                                  | 2014 | 1.355  | 0.175  | 0.364      |      |
|         |                                  | 2015 | 1.828  | 0.068  | 0.205      |      |
|         |                                  | 2016 | 0.546  | 0.585  | 0.782      |      |
|         |                                  | 2017 | -0.313 | 0.754  | 0.889      |      |
|         |                                  | 2018 | -1.964 | 0.050  | 0.165      |      |
|         |                                  | 2013 | -0.520 | 0.603  | 0.789      |      |
|         |                                  | 2014 | 1.203  | 0.229  | 0.431      |      |
| scipy   | comment:issue $\times$ nonmember | 2015 | 3.083  | 0.002  | 0.018      | *    |
|         |                                  | 2016 | 0.078  | 0.938  | 0.960      |      |
|         |                                  | 2017 | 1.478  | 0.139  | 0.319      |      |
|         |                                  | 2018 | 2.634  | 0.008  | 0.048      | *    |
|         |                                  | 2011 | -0.108 | 0.914  | 0.959      |      |
|         |                                  | 2012 | 0.475  | 0.635  | 0.821      |      |
|         |                                  | 2013 | -0.198 | 0.843  | 0.934      |      |
| scipy   | post:PR $\times$ member          | 2014 | -0.794 | 0.427  | 0.649      |      |
|         |                                  | 2015 | 0.690  | 0.490  | 0.707      |      |
|         |                                  | 2016 | 1.212  | 0.226  | 0.427      |      |
|         |                                  | 2017 | -0.804 | 0.421  | 0.644      |      |
|         |                                  | 2018 | -1.365 | 0.172  | 0.363      |      |
|         |                                  | 2011 | 1.017  | 0.309  | 0.510      |      |
|         |                                  | 2012 | -0.375 | 0.708  | 0.867      |      |
|         |                                  | 2013 | -0.001 | 0.999  | 0.999      |      |
| scipy   | post:PR $\times$ nonmember       | 2014 | 0.580  | 0.562  | 0.769      |      |
|         |                                  | 2015 | 2.742  | 0.006  | 0.041      | *    |
|         |                                  | 2016 | 0.408  | 0.683  | 0.851      |      |
|         |                                  | 2017 | 0.760  | 0.447  | 0.667      |      |
|         |                                  | 2018 | -0.561 | 0.575  | 0.782      |      |

Continued on next page

| Project        | Contrast                         | Year | t-stat | p-val. | p-val adj. | sig. |
|----------------|----------------------------------|------|--------|--------|------------|------|
| scipy          | post:issue $\times$ member       | 2013 | -1.485 | 0.138  | 0.316      |      |
|                |                                  | 2014 | -0.926 | 0.355  | 0.575      |      |
|                |                                  | 2015 | -0.259 | 0.796  | 0.901      |      |
|                |                                  | 2016 | -1.515 | 0.130  | 0.312      |      |
|                |                                  | 2017 | -3.157 | 0.002  | 0.015      | *    |
|                |                                  | 2018 | -1.822 | 0.069  | 0.206      |      |
| scipy          | post:issue $\times$ nonmember    | 2013 | 0.327  | 0.744  | 0.886      |      |
|                |                                  | 2014 | -0.025 | 0.980  | 0.992      |      |
|                |                                  | 2015 | -1.672 | 0.095  | 0.254      |      |
|                |                                  | 2016 | -0.089 | 0.929  | 0.959      |      |
|                |                                  | 2017 | 1.153  | 0.249  | 0.449      |      |
|                |                                  | 2018 | -1.153 | 0.249  | 0.449      |      |
| sphinx-gallery | comment:PR $\times$ member       | 2015 | 1.543  | 0.123  | 0.305      |      |
|                |                                  | 2016 | -0.309 | 0.757  | 0.889      |      |
|                |                                  | 2017 | -1.087 | 0.277  | 0.472      |      |
|                |                                  | 2018 | 2.218  | 0.027  | 0.102      |      |
| sphinx-gallery | comment:PR $\times$ nonmember    | 2014 | -0.283 | 0.777  | 0.895      |      |
|                |                                  | 2015 | 0.273  | 0.785  | 0.895      |      |
|                |                                  | 2016 | -1.107 | 0.268  | 0.465      |      |
|                |                                  | 2017 | -0.230 | 0.818  | 0.918      |      |
|                |                                  | 2018 | 0.869  | 0.385  | 0.608      |      |
| sphinx-gallery | comment:issue $\times$ member    | 2015 | -0.334 | 0.739  | 0.886      |      |
|                |                                  | 2016 | 1.352  | 0.176  | 0.364      |      |
|                |                                  | 2017 | 2.672  | 0.008  | 0.045      | *    |
|                |                                  | 2018 | 3.503  | 0.000  | 0.006      | **   |
|                |                                  | 2014 | 0.058  | 0.954  | 0.972      |      |
| sphinx-gallery | comment:issue $\times$ nonmember | 2015 | -0.023 | 0.982  | 0.992      |      |
|                |                                  |      |        |        |            |      |

Continued on next page

| Project        | Contrast               | Year | t-stat | p-val. | p-val adj. | sig. |
|----------------|------------------------|------|--------|--------|------------|------|
|                |                        | 2016 | 1.222  | 0.222  | 0.422      |      |
|                |                        | 2017 | 0.637  | 0.524  | 0.738      |      |
|                |                        | 2018 | 2.301  | 0.021  | 0.087      | .    |
|                |                        | 2015 | 1.495  | 0.135  | 0.314      |      |
| sphinx-gallery | post:PR × member       | 2016 | 0.139  | 0.889  | 0.949      |      |
|                |                        | 2017 | -0.223 | 0.824  | 0.920      |      |
|                |                        | 2018 | 0.140  | 0.889  | 0.949      |      |
|                |                        | 2014 | 1.736  | 0.083  | 0.235      |      |
|                |                        | 2015 | 1.437  | 0.151  | 0.334      |      |
| sphinx-gallery | post:PR × nonmember    | 2016 | -0.792 | 0.429  | 0.649      |      |
|                |                        | 2017 | 1.437  | 0.151  | 0.334      |      |
|                |                        | 2018 | 0.853  | 0.394  | 0.614      |      |
|                |                        | 2015 | -0.440 | 0.660  | 0.838      |      |
|                |                        | 2016 | -2.083 | 0.037  | 0.134      |      |
| sphinx-gallery | post:issue × member    | 2017 | -0.177 | 0.859  | 0.934      |      |
|                |                        | 2018 | 2.010  | 0.044  | 0.151      |      |
|                |                        | 2014 | 1.349  | 0.177  | 0.364      |      |
|                |                        | 2015 | -0.184 | 0.854  | 0.934      |      |
| sphinx-gallery | post:issue × nonmember | 2016 | -0.791 | 0.429  | 0.649      |      |
|                |                        | 2017 | 0.196  | 0.845  | 0.934      |      |
|                |                        | 2018 | -2.166 | 0.030  | 0.116      |      |

**Supplementary Table 3**

*Results of analyses of changes in sentiment over time by project, activity (posted issue [post:issue], comment on an issue [comment:issue], posted pull request [post:PR], or comment on a pull request [comment:PR]), and membership (member or nonmember at time of post). All p-values adjusted for multiple comparisons using Benjamini-Hochberg. Legend: . =  $p < .10$ ; \* =  $p < .05$ ; \*\* =  $p < .001$ ; \*\*\* =  $p < .0001$*

| Project    | Contrast                         | Year | t-stat | p-val. | p-val adj. | sig. |
|------------|----------------------------------|------|--------|--------|------------|------|
| matplotlib | comment:PR $\times$ member       | 2011 | -0.210 | 0.834  | 0.931      |      |
|            |                                  | 2012 | -2.135 | 0.033  | 0.127      |      |
|            |                                  | 2013 | 0.784  | 0.433  | 0.709      |      |
|            |                                  | 2014 | -2.363 | 0.018  | 0.081      | .    |
|            |                                  | 2015 | -3.106 | 0.002  | 0.014      | *    |
|            |                                  | 2016 | -2.742 | 0.006  | 0.034      | *    |
|            |                                  | 2017 | -3.346 | 0.001  | 0.007      | **   |
|            |                                  | 2018 | -4.343 | 0.000  | 0.000      | ***  |
| matplotlib | comment:PR $\times$ nonmember    | 2011 | -1.296 | 0.195  | 0.435      |      |
|            |                                  | 2012 | 2.967  | 0.003  | 0.019      | *    |
|            |                                  | 2013 | -0.261 | 0.794  | 0.919      |      |
|            |                                  | 2014 | -1.121 | 0.262  | 0.544      |      |
|            |                                  | 2015 | -1.475 | 0.140  | 0.363      |      |
|            |                                  | 2016 | -0.194 | 0.846  | 0.937      |      |
|            |                                  | 2017 | 0.513  | 0.608  | 0.811      |      |
|            |                                  | 2018 | 0.272  | 0.785  | 0.918      |      |
| matplotlib | comment:issue $\times$ member    | 2011 | 0.583  | 0.560  | 0.792      |      |
|            |                                  | 2012 | 2.052  | 0.040  | 0.150      |      |
|            |                                  | 2013 | 3.060  | 0.002  | 0.015      | *    |
|            |                                  | 2014 | 2.364  | 0.018  | 0.081      | .    |
|            |                                  | 2015 | 3.845  | 0.000  | 0.001      | **   |
|            |                                  | 2016 | 3.633  | 0.000  | 0.003      | **   |
|            |                                  | 2017 | 3.031  | 0.002  | 0.016      | *    |
|            |                                  | 2018 | 4.867  | 0.000  | 0.000      | ***  |
| matplotlib | comment:issue $\times$ nonmember | 2011 | 1.023  | 0.306  | 0.601      |      |
|            |                                  | 2012 | -2.552 | 0.011  | 0.053      | .    |
|            |                                  | 2013 | -1.022 | 0.307  | 0.601      |      |

Continued on next page

| Project    | Contrast                   | Year | t-stat | p-val. | p-val adj. | sig. |
|------------|----------------------------|------|--------|--------|------------|------|
|            |                            | 2014 | -2.421 | 0.015  | 0.071      | .    |
|            |                            | 2015 | 1.800  | 0.072  | 0.229      |      |
|            |                            | 2016 | 1.246  | 0.213  | 0.462      |      |
|            |                            | 2017 | 1.195  | 0.232  | 0.496      |      |
|            |                            | 2018 | 2.718  | 0.007  | 0.036      | *    |
|            |                            | 2011 | 1.392  | 0.164  | 0.400      |      |
|            |                            | 2012 | 5.482  | 0.000  | 0.000      | ***  |
|            |                            | 2013 | 1.664  | 0.096  | 0.278      |      |
|            |                            | 2014 | 2.002  | 0.045  | 0.161      |      |
| matplotlib | post:PR $\times$ member    | 2015 | 2.898  | 0.004  | 0.023      | *    |
|            |                            | 2016 | 3.891  | 0.000  | 0.001      | **   |
|            |                            | 2017 | 3.508  | 0.000  | 0.004      | **   |
|            |                            | 2018 | 4.079  | 0.000  | 0.001      | ***  |
|            |                            | 2011 | -0.243 | 0.808  | 0.920      |      |
|            |                            | 2012 | 0.913  | 0.361  | 0.645      |      |
|            |                            | 2013 | -0.269 | 0.788  | 0.918      |      |
|            |                            | 2014 | 0.188  | 0.851  | 0.937      |      |
| matplotlib | post:PR $\times$ nonmember | 2015 | -0.974 | 0.330  | 0.621      |      |
|            |                            | 2016 | 0.028  | 0.978  | 0.982      |      |
|            |                            | 2017 | 0.241  | 0.810  | 0.920      |      |
|            |                            | 2018 | 0.240  | 0.810  | 0.920      |      |
|            |                            | 2011 | 6.754  | 0.000  | 0.000      | ***  |
|            |                            | 2012 | 0.527  | 0.598  | 0.801      |      |
|            |                            | 2013 | 0.460  | 0.645  | 0.826      |      |
|            |                            | 2014 | 1.036  | 0.300  | 0.596      |      |
| matplotlib | post:issue $\times$ member | 2015 | 2.036  | 0.042  | 0.151      |      |
|            |                            | 2016 | 2.614  | 0.009  | 0.046      | *    |

Continued on next page

| Project    | Contrast                      | Year | t-stat | p-val. | p-val adj. | sig. |
|------------|-------------------------------|------|--------|--------|------------|------|
|            |                               | 2017 | 1.380  | 0.168  | 0.404      |      |
|            |                               | 2018 | 0.976  | 0.329  | 0.621      |      |
|            |                               | 2011 | -1.633 | 0.103  | 0.286      |      |
|            |                               | 2012 | -0.173 | 0.862  | 0.943      |      |
|            |                               | 2013 | 1.787  | 0.074  | 0.232      |      |
| matplotlib | post:issue $\times$ nonmember | 2014 | 1.196  | 0.232  | 0.496      |      |
|            |                               | 2015 | -0.902 | 0.367  | 0.645      |      |
|            |                               | 2016 | 1.741  | 0.082  | 0.245      |      |
|            |                               | 2017 | -2.072 | 0.038  | 0.145      |      |
|            |                               | 2018 | -0.998 | 0.318  | 0.613      |      |
|            |                               | 2013 | 0.575  | 0.566  | 0.793      |      |
|            |                               | 2014 | 2.237  | 0.025  | 0.105      |      |
| mayavi     | comment:PR $\times$ member    | 2015 | 0.765  | 0.444  | 0.711      |      |
|            |                               | 2016 | 4.453  | 0.000  | 0.000      | ***  |
|            |                               | 2017 | 5.386  | 0.000  | 0.000      | ***  |
|            |                               | 2018 | 3.407  | 0.001  | 0.006      | **   |
|            |                               | 2011 | 1.684  | 0.092  | 0.270      |      |
|            |                               | 2012 | 2.840  | 0.005  | 0.027      | *    |
|            |                               | 2013 | 3.672  | 0.000  | 0.003      | **   |
| mayavi     | comment:PR $\times$ nonmember | 2014 | -0.272 | 0.786  | 0.918      |      |
|            |                               | 2015 | 0.669  | 0.504  | 0.750      |      |
|            |                               | 2016 | 2.454  | 0.014  | 0.068      | .    |
|            |                               | 2017 | -0.164 | 0.869  | 0.943      |      |
|            |                               | 2018 | 1.791  | 0.073  | 0.232      |      |
|            |                               | 2012 | -0.619 | 0.536  | 0.775      |      |
|            |                               | 2013 | -0.726 | 0.468  | 0.725      |      |
|            |                               | 2014 | -2.992 | 0.003  | 0.018      | *    |
| mayavi     | comment:issue $\times$ member |      |        |        |            |      |

Continued on next page



| Project | Contrast                  | Year | t-stat | p-val. | p-val adj. | sig. |
|---------|---------------------------|------|--------|--------|------------|------|
|         |                           | 2015 | 1.745  | 0.081  | 0.244      |      |
|         |                           | 2016 | 3.713  | 0.000  | 0.002      | **   |
|         |                           | 2017 | -0.977 | 0.329  | 0.621      |      |
|         |                           | 2018 | -2.429 | 0.015  | 0.070      | .    |
|         |                           | 2011 | -1.772 | 0.076  | 0.238      |      |
|         |                           | 2012 | -2.183 | 0.029  | 0.116      |      |
|         |                           | 2013 | 0.132  | 0.895  | 0.951      |      |
| mayavi  | comment:issue × nonmember | 2014 | -0.228 | 0.819  | 0.925      |      |
|         |                           | 2015 | -0.925 | 0.355  | 0.636      |      |
|         |                           | 2016 | 2.849  | 0.004  | 0.027      | *    |
|         |                           | 2017 | 1.312  | 0.189  | 0.430      |      |
|         |                           | 2018 | 5.882  | 0.000  | 0.000      | ***  |
|         |                           | 2013 | -0.678 | 0.498  | 0.750      |      |
|         |                           | 2014 | -1.764 | 0.078  | 0.239      |      |
| mayavi  | post:PR × member          | 2015 | 0.371  | 0.711  | 0.879      |      |
|         |                           | 2016 | 1.723  | 0.085  | 0.252      |      |
|         |                           | 2017 | 0.438  | 0.662  | 0.833      |      |
|         |                           | 2018 | -3.214 | 0.001  | 0.010      | *    |
|         |                           | 2011 | 0.168  | 0.867  | 0.943      |      |
|         |                           | 2012 | 1.362  | 0.173  | 0.412      |      |
|         |                           | 2013 | -0.011 | 0.991  | 0.991      |      |
| mayavi  | post:PR × nonmember       | 2014 | 0.694  | 0.487  | 0.743      |      |
|         |                           | 2015 | -0.440 | 0.660  | 0.833      |      |
|         |                           | 2016 | 0.759  | 0.448  | 0.712      |      |
|         |                           | 2017 | 0.490  | 0.624  | 0.816      |      |
|         |                           | 2018 | -0.071 | 0.943  | 0.968      |      |
|         |                           | 2013 | -0.572 | 0.567  | 0.793      |      |

Continued on next page

|        |                     |
|--------|---------------------|
| mayavi | post:issue × member |
|--------|---------------------|

| Project | Contrast                      | Year | t-stat | p-val. | p-val adj. | sig. |
|---------|-------------------------------|------|--------|--------|------------|------|
|         |                               | 2015 | 0.959  | 0.337  | 0.623      |      |
|         |                               | 2016 | 1.133  | 0.257  | 0.539      |      |
|         |                               | 2017 | 0.531  | 0.596  | 0.801      |      |
|         |                               | 2018 | -0.439 | 0.661  | 0.833      |      |
|         |                               | 2011 | 1.042  | 0.297  | 0.595      |      |
|         |                               | 2012 | 0.447  | 0.655  | 0.833      |      |
|         |                               | 2013 | 0.804  | 0.421  | 0.704      |      |
| mayavi  | post:issue $\times$ nonmember | 2014 | 2.431  | 0.015  | 0.070      | .    |
|         |                               | 2015 | 3.641  | 0.000  | 0.003      | **   |
|         |                               | 2016 | 2.795  | 0.005  | 0.030      | *    |
|         |                               | 2017 | 2.135  | 0.033  | 0.127      |      |
|         |                               | 2018 | 4.251  | 0.000  | 0.000      | ***  |
|         |                               | 2010 | -2.524 | 0.012  | 0.057      | .    |
|         |                               | 2011 | -5.381 | 0.000  | 0.000      | ***  |
|         |                               | 2012 | -9.248 | 0.000  | 0.000      | ***  |
|         |                               | 2013 | -4.219 | 0.000  | 0.000      | ***  |
| numpy   | comment:PR $\times$ member    | 2014 | 0.869  | 0.385  | 0.662      |      |
|         |                               | 2015 | 2.704  | 0.007  | 0.037      | *    |
|         |                               | 2016 | 0.615  | 0.538  | 0.776      |      |
|         |                               | 2017 | -5.809 | 0.000  | 0.000      | ***  |
|         |                               | 2018 | -0.557 | 0.577  | 0.796      |      |
|         |                               | 2010 | 0.059  | 0.953  | 0.973      |      |
|         |                               | 2011 | 0.534  | 0.593  | 0.801      |      |
|         |                               | 2012 | -2.476 | 0.013  | 0.065      | .    |
|         |                               | 2013 | -2.401 | 0.016  | 0.075      | .    |
| numpy   | comment:PR $\times$ nonmember | 2014 | -0.777 | 0.437  | 0.709      |      |
|         |                               | 2015 | 1.247  | 0.212  | 0.462      |      |

Continued on next page

| Project | Contrast                         | Year | t-stat | p-val. | p-val adj. | sig. |
|---------|----------------------------------|------|--------|--------|------------|------|
|         |                                  | 2016 | 1.473  | 0.141  | 0.363      |      |
|         |                                  | 2017 | -1.066 | 0.286  | 0.578      |      |
|         |                                  | 2018 | 0.658  | 0.511  | 0.750      |      |
|         |                                  | 2012 | -4.025 | 0.000  | 0.001      | ***  |
|         |                                  | 2013 | -4.751 | 0.000  | 0.000      | ***  |
|         |                                  | 2014 | -5.043 | 0.000  | 0.000      | ***  |
| numpy   | comment:issue $\times$ member    | 2015 | -1.394 | 0.163  | 0.400      |      |
|         |                                  | 2016 | -3.077 | 0.002  | 0.015      | *    |
|         |                                  | 2017 | -4.283 | 0.000  | 0.000      | ***  |
|         |                                  | 2018 | -2.714 | 0.007  | 0.036      | *    |
|         |                                  | 2012 | -2.146 | 0.032  | 0.125      |      |
|         |                                  | 2013 | -0.884 | 0.377  | 0.655      |      |
|         |                                  | 2014 | -0.534 | 0.593  | 0.801      |      |
| numpy   | comment:issue $\times$ nonmember | 2015 | 1.309  | 0.191  | 0.430      |      |
|         |                                  | 2016 | -2.200 | 0.028  | 0.112      |      |
|         |                                  | 2017 | 0.588  | 0.556  | 0.792      |      |
|         |                                  | 2018 | 3.663  | 0.000  | 0.003      | **   |
|         |                                  | 2010 | 0.162  | 0.871  | 0.943      |      |
|         |                                  | 2011 | -0.794 | 0.427  | 0.707      |      |
|         |                                  | 2012 | -2.756 | 0.006  | 0.033      | *    |
|         |                                  | 2013 | -1.954 | 0.051  | 0.176      |      |
| numpy   | post:PR $\times$ member          | 2014 | -0.261 | 0.794  | 0.919      |      |
|         |                                  | 2015 | -1.517 | 0.129  | 0.345      |      |
|         |                                  | 2016 | -1.356 | 0.175  | 0.412      |      |
|         |                                  | 2017 | -0.666 | 0.505  | 0.750      |      |
|         |                                  | 2018 | -0.631 | 0.528  | 0.772      |      |
|         |                                  | 2010 | 1.358  | 0.174  | 0.412      |      |

Continued on next page

| Project | Contrast               | Year | t-stat | p-val. | p-val adj. | sig. |
|---------|------------------------|------|--------|--------|------------|------|
|         |                        | 2011 | -0.799 | 0.424  | 0.704      |      |
|         |                        | 2012 | -1.119 | 0.263  | 0.544      |      |
|         |                        | 2013 | -0.771 | 0.440  | 0.710      |      |
|         |                        | 2014 | -0.963 | 0.335  | 0.623      |      |
|         |                        | 2015 | -0.947 | 0.344  | 0.625      |      |
|         |                        | 2016 | -1.105 | 0.269  | 0.552      |      |
|         |                        | 2017 | -0.105 | 0.916  | 0.957      |      |
|         |                        | 2018 | 0.364  | 0.716  | 0.883      |      |
|         |                        | 2012 | 0.487  | 0.626  | 0.816      |      |
|         |                        | 2013 | -0.944 | 0.345  | 0.626      |      |
|         |                        | 2014 | 0.457  | 0.647  | 0.827      |      |
| numpy   | post:issue × member    | 2015 | -0.113 | 0.910  | 0.956      |      |
|         |                        | 2016 | -0.218 | 0.827  | 0.931      |      |
|         |                        | 2017 | 0.253  | 0.800  | 0.920      |      |
|         |                        | 2018 | 1.025  | 0.305  | 0.601      |      |
|         |                        | 2012 | -0.757 | 0.449  | 0.712      |      |
|         |                        | 2013 | 0.336  | 0.737  | 0.896      |      |
|         |                        | 2014 | -2.816 | 0.005  | 0.029      | *    |
| numpy   | post:issue × nonmember | 2015 | -1.456 | 0.145  | 0.369      |      |
|         |                        | 2016 | -1.315 | 0.189  | 0.430      |      |
|         |                        | 2017 | 0.824  | 0.410  | 0.693      |      |
|         |                        | 2018 | 0.472  | 0.637  | 0.819      |      |
|         |                        | 2011 | 8.185  | 0.000  | 0.000      | ***  |
|         |                        | 2012 | 7.451  | 0.000  | 0.000      | ***  |
|         |                        | 2013 | -7.231 | 0.000  | 0.000      | ***  |
|         |                        | 2014 | -1.461 | 0.144  | 0.368      |      |
| pandas  | comment:PR × member    | 2015 | 1.862  | 0.063  | 0.207      |      |

Continued on next page

| Project | Contrast                         | Year | t-stat | p-val. | p-val adj. | sig. |
|---------|----------------------------------|------|--------|--------|------------|------|
|         |                                  | 2016 | -0.156 | 0.876  | 0.945      |      |
|         |                                  | 2017 | 5.417  | 0.000  | 0.000      | ***  |
|         |                                  | 2018 | 11.183 | 0.000  | 0.000      | ***  |
|         |                                  | 2011 | 1.443  | 0.149  | 0.377      |      |
|         |                                  | 2012 | 1.759  | 0.079  | 0.240      |      |
|         |                                  | 2013 | 0.948  | 0.343  | 0.625      |      |
| pandas  | comment:PR $\times$ nonmember    | 2014 | 0.170  | 0.865  | 0.943      |      |
|         |                                  | 2015 | -0.722 | 0.470  | 0.726      |      |
|         |                                  | 2016 | -2.669 | 0.008  | 0.040      | *    |
|         |                                  | 2017 | 0.204  | 0.838  | 0.931      |      |
|         |                                  | 2018 | 0.504  | 0.615  | 0.812      |      |
|         |                                  | 2010 | 0.243  | 0.808  | 0.920      |      |
|         |                                  | 2011 | -0.904 | 0.366  | 0.645      |      |
|         |                                  | 2012 | -3.540 | 0.000  | 0.004      | **   |
|         |                                  | 2013 | -0.661 | 0.509  | 0.750      |      |
| pandas  | comment:issue $\times$ member    | 2014 | 1.185  | 0.236  | 0.501      |      |
|         |                                  | 2015 | -0.218 | 0.828  | 0.931      |      |
|         |                                  | 2016 | -1.083 | 0.279  | 0.567      |      |
|         |                                  | 2017 | 0.612  | 0.540  | 0.776      |      |
|         |                                  | 2018 | 2.906  | 0.004  | 0.023      | *    |
|         |                                  | 2010 | -0.212 | 0.832  | 0.931      |      |
|         |                                  | 2011 | 2.073  | 0.038  | 0.145      |      |
|         |                                  | 2012 | 3.458  | 0.001  | 0.005      | **   |
|         |                                  | 2013 | 4.576  | 0.000  | 0.000      | ***  |
| pandas  | comment:issue $\times$ nonmember | 2014 | 3.234  | 0.001  | 0.010      | **   |
|         |                                  | 2015 | 0.533  | 0.594  | 0.801      |      |
|         |                                  | 2016 | 1.310  | 0.190  | 0.430      |      |

Continued on next page

| Project | Contrast            | Year | t-stat | p-val. | p-val adj. | sig. |
|---------|---------------------|------|--------|--------|------------|------|
|         |                     | 2017 | -1.624 | 0.104  | 0.289      |      |
|         |                     | 2018 | -5.942 | 0.000  | 0.000      | ***  |
|         |                     | 2011 | 0.672  | 0.502  | 0.750      |      |
|         |                     | 2012 | -2.687 | 0.007  | 0.038      | *    |
|         |                     | 2013 | 0.049  | 0.961  | 0.973      |      |
| pandas  | post:PR × member    | 2014 | -0.092 | 0.926  | 0.960      |      |
|         |                     | 2015 | -0.659 | 0.510  | 0.750      |      |
|         |                     | 2016 | -1.393 | 0.164  | 0.400      |      |
|         |                     | 2017 | 1.001  | 0.317  | 0.613      |      |
|         |                     | 2018 | 2.038  | 0.042  | 0.151      |      |
|         |                     | 2011 | -0.508 | 0.612  | 0.812      |      |
|         |                     | 2012 | -1.406 | 0.160  | 0.395      |      |
|         |                     | 2013 | 0.025  | 0.980  | 0.982      |      |
| pandas  | post:PR × nonmember | 2014 | 1.479  | 0.139  | 0.363      |      |
|         |                     | 2015 | 0.071  | 0.944  | 0.968      |      |
|         |                     | 2016 | 0.484  | 0.629  | 0.816      |      |
|         |                     | 2017 | 0.118  | 0.906  | 0.954      |      |
|         |                     | 2018 | -1.250 | 0.211  | 0.462      |      |
|         |                     | 2010 | 0.880  | 0.379  | 0.656      |      |
|         |                     | 2011 | -3.969 | 0.000  | 0.001      | ***  |
|         |                     | 2012 | -4.272 | 0.000  | 0.000      | ***  |
|         |                     | 2013 | 0.328  | 0.743  | 0.900      |      |
| pandas  | post:issue × member | 2014 | -0.269 | 0.788  | 0.918      |      |
|         |                     | 2015 | -0.618 | 0.536  | 0.775      |      |
|         |                     | 2016 | -0.629 | 0.529  | 0.772      |      |
|         |                     | 2017 | 0.741  | 0.459  | 0.715      |      |
|         |                     | 2018 | 1.367  | 0.172  | 0.412      |      |

Continued on next page

| Project      | Contrast                      | Year | t-stat | p-val. | p-val adj. | sig. |
|--------------|-------------------------------|------|--------|--------|------------|------|
| pandas       | post:issue $\times$ nonmember | 2010 | 0.857  | 0.391  | 0.666      |      |
|              |                               | 2011 | 0.318  | 0.750  | 0.902      |      |
|              |                               | 2012 | -1.018 | 0.309  | 0.601      |      |
|              |                               | 2013 | -2.332 | 0.020  | 0.086      | .    |
|              |                               | 2014 | -1.130 | 0.259  | 0.540      |      |
|              |                               | 2015 | -2.253 | 0.024  | 0.103      |      |
|              |                               | 2016 | -3.975 | 0.000  | 0.001      | ***  |
|              |                               | 2017 | -3.664 | 0.000  | 0.003      | **   |
| scikit-image | comment:PR $\times$ member    | 2018 | -2.958 | 0.003  | 0.020      | *    |
|              |                               | 2011 | 3.652  | 0.000  | 0.003      | **   |
|              |                               | 2012 | 0.782  | 0.434  | 0.709      |      |
|              |                               | 2013 | 1.465  | 0.143  | 0.367      |      |
|              |                               | 2014 | -0.538 | 0.590  | 0.801      |      |
|              |                               | 2015 | 3.072  | 0.002  | 0.015      | *    |
|              |                               | 2016 | 0.303  | 0.762  | 0.908      |      |
|              |                               | 2017 | 1.337  | 0.181  | 0.423      |      |
| scikit-image | comment:PR $\times$ nonmember | 2018 | -5.431 | 0.000  | 0.000      | ***  |
|              |                               | 2011 | 0.475  | 0.635  | 0.819      |      |
|              |                               | 2012 | -2.376 | 0.018  | 0.079      | .    |
|              |                               | 2013 | -0.753 | 0.451  | 0.712      |      |
|              |                               | 2014 | -0.398 | 0.690  | 0.863      |      |
|              |                               | 2015 | -0.481 | 0.630  | 0.816      |      |
|              |                               | 2016 | 1.564  | 0.118  | 0.319      |      |
|              |                               | 2017 | -0.106 | 0.916  | 0.957      |      |
|              |                               | 2018 | 0.679  | 0.497  | 0.750      |      |
|              |                               | 2011 | -1.163 | 0.245  | 0.517      |      |
|              |                               | 2012 | 0.782  | 0.434  | 0.709      |      |

Continued on next page

scikit-image comment:issue  $\times$  member

| Project      | Contrast                         | Year | t-stat | p-val. | p-val adj. | sig. |
|--------------|----------------------------------|------|--------|--------|------------|------|
|              |                                  | 2013 | -1.764 | 0.078  | 0.239      |      |
|              |                                  | 2014 | -1.837 | 0.066  | 0.216      |      |
|              |                                  | 2015 | 0.099  | 0.921  | 0.957      |      |
|              |                                  | 2016 | -0.565 | 0.572  | 0.796      |      |
|              |                                  | 2017 | -1.039 | 0.299  | 0.596      |      |
|              |                                  | 2018 | -1.303 | 0.193  | 0.432      |      |
|              |                                  | 2011 | -1.818 | 0.069  | 0.224      |      |
|              |                                  | 2012 | -0.747 | 0.455  | 0.715      |      |
|              |                                  | 2013 | -1.208 | 0.227  | 0.489      |      |
| scikit-image | comment:issue $\times$ nonmember | 2014 | -0.117 | 0.907  | 0.954      |      |
|              |                                  | 2015 | -2.146 | 0.032  | 0.125      |      |
|              |                                  | 2016 | 0.254  | 0.799  | 0.920      |      |
|              |                                  | 2017 | -0.484 | 0.628  | 0.816      |      |
|              |                                  | 2018 | 2.233  | 0.026  | 0.105      |      |
|              |                                  | 2011 | -0.625 | 0.532  | 0.774      |      |
|              |                                  | 2012 | -3.137 | 0.002  | 0.013      | *    |
|              |                                  | 2013 | -1.642 | 0.101  | 0.284      |      |
| scikit-image | post:PR $\times$ member          | 2014 | -0.930 | 0.352  | 0.634      |      |
|              |                                  | 2015 | -0.546 | 0.585  | 0.801      |      |
|              |                                  | 2016 | -1.710 | 0.087  | 0.257      |      |
|              |                                  | 2017 | -1.940 | 0.052  | 0.178      |      |
|              |                                  | 2018 | -0.959 | 0.337  | 0.623      |      |
|              |                                  | 2011 | -0.129 | 0.897  | 0.951      |      |
|              |                                  | 2012 | -0.035 | 0.972  | 0.980      |      |
|              |                                  | 2013 | 0.240  | 0.810  | 0.920      |      |
| scikit-image | post:PR $\times$ nonmember       | 2014 | 0.462  | 0.644  | 0.826      |      |
|              |                                  | 2015 | 0.661  | 0.509  | 0.750      |      |

Continued on next page



| Project      | Contrast                      | Year | t-stat | p-val. | p-val adj. | sig. |
|--------------|-------------------------------|------|--------|--------|------------|------|
|              |                               | 2016 | -0.084 | 0.933  | 0.965      |      |
|              |                               | 2017 | -0.878 | 0.380  | 0.656      |      |
|              |                               | 2018 | 0.193  | 0.847  | 0.937      |      |
|              |                               | 2011 | -0.137 | 0.891  | 0.948      |      |
|              |                               | 2012 | -0.746 | 0.456  | 0.715      |      |
|              |                               | 2013 | -1.321 | 0.186  | 0.429      |      |
|              |                               | 2014 | -1.807 | 0.071  | 0.227      |      |
| scikit-image | post:issue $\times$ member    | 2015 | -2.056 | 0.040  | 0.149      |      |
|              |                               | 2016 | -1.620 | 0.105  | 0.291      |      |
|              |                               | 2017 | -1.935 | 0.053  | 0.179      |      |
|              |                               | 2018 | -0.526 | 0.599  | 0.801      |      |
|              |                               | 2011 | 0.801  | 0.423  | 0.704      |      |
|              |                               | 2012 | -0.350 | 0.726  | 0.888      |      |
|              |                               | 2013 | 0.717  | 0.474  | 0.729      |      |
|              |                               | 2014 | 1.510  | 0.131  | 0.347      |      |
| scikit-image | post:issue $\times$ nonmember | 2015 | 1.093  | 0.274  | 0.560      |      |
|              |                               | 2016 | 0.147  | 0.883  | 0.948      |      |
|              |                               | 2017 | 0.580  | 0.562  | 0.793      |      |
|              |                               | 2018 | 0.305  | 0.761  | 0.908      |      |
|              |                               | 2010 | 1.983  | 0.047  | 0.167      |      |
|              |                               | 2011 | -0.505 | 0.613  | 0.812      |      |
|              |                               | 2012 | 3.237  | 0.001  | 0.010      | **   |
|              |                               | 2013 | 4.758  | 0.000  | 0.000      | ***  |
|              |                               | 2014 | 1.075  | 0.282  | 0.572      |      |
| scikit-learn | comment:PR $\times$ member    | 2015 | -3.047 | 0.002  | 0.016      | *    |
|              |                               | 2016 | -1.981 | 0.048  | 0.167      |      |
|              |                               | 2017 | -1.417 | 0.157  | 0.389      |      |

Continued on next page

| Project      | Contrast                         | Year | t-stat  | p-val. | p-val adj. | sig. |
|--------------|----------------------------------|------|---------|--------|------------|------|
|              |                                  | 2018 | -11.181 | 0.000  | 0.000      | ***  |
|              |                                  | 2010 | -0.311  | 0.756  | 0.905      |      |
|              |                                  | 2011 | 0.532   | 0.595  | 0.801      |      |
|              |                                  | 2012 | 0.139   | 0.890  | 0.948      |      |
|              |                                  | 2013 | 1.926   | 0.054  | 0.181      |      |
| scikit-learn | comment:PR $\times$ nonmember    | 2014 | -0.702  | 0.483  | 0.740      |      |
|              |                                  | 2015 | 0.049   | 0.961  | 0.973      |      |
|              |                                  | 2016 | -0.355  | 0.722  | 0.887      |      |
|              |                                  | 2017 | -1.388  | 0.165  | 0.400      |      |
|              |                                  | 2018 | -4.486  | 0.000  | 0.000      | ***  |
|              |                                  | 2010 | -0.190  | 0.849  | 0.937      |      |
|              |                                  | 2011 | 1.880   | 0.060  | 0.200      |      |
|              |                                  | 2012 | 4.909   | 0.000  | 0.000      | ***  |
|              |                                  | 2013 | 3.104   | 0.002  | 0.014      | *    |
| scikit-learn | comment:issue $\times$ member    | 2014 | 1.811   | 0.070  | 0.226      |      |
|              |                                  | 2015 | -0.979  | 0.328  | 0.621      |      |
|              |                                  | 2016 | -0.742  | 0.458  | 0.715      |      |
|              |                                  | 2017 | -0.349  | 0.727  | 0.888      |      |
|              |                                  | 2018 | -5.589  | 0.000  | 0.000      | ***  |
|              |                                  | 2010 | 0.282   | 0.778  | 0.917      |      |
|              |                                  | 2011 | -1.048  | 0.295  | 0.592      |      |
|              |                                  | 2012 | 1.725   | 0.085  | 0.252      |      |
|              |                                  | 2013 | -1.423  | 0.155  | 0.389      |      |
| scikit-learn | comment:issue $\times$ nonmember | 2014 | -1.653  | 0.098  | 0.282      |      |
|              |                                  | 2015 | -2.440  | 0.015  | 0.070      | .    |
|              |                                  | 2016 | -3.250  | 0.001  | 0.010      | **   |
|              |                                  | 2017 | -2.232  | 0.026  | 0.105      |      |

Continued on next page

| Project      | Contrast                   | Year | t-stat | p-val. | p-val adj. | sig. |
|--------------|----------------------------|------|--------|--------|------------|------|
|              |                            | 2018 | -4.177 | 0.000  | 0.000      | ***  |
|              |                            | 2010 | -0.384 | 0.701  | 0.871      |      |
|              |                            | 2011 | -0.538 | 0.591  | 0.801      |      |
|              |                            | 2012 | 0.602  | 0.547  | 0.784      |      |
|              |                            | 2013 | 0.031  | 0.975  | 0.982      |      |
| scikit-learn | post:PR $\times$ member    | 2014 | -0.954 | 0.340  | 0.625      |      |
|              |                            | 2015 | -0.432 | 0.666  | 0.837      |      |
|              |                            | 2016 | -1.592 | 0.111  | 0.304      |      |
|              |                            | 2017 | -3.092 | 0.002  | 0.014      | *    |
|              |                            | 2018 | -4.746 | 0.000  | 0.000      | ***  |
|              |                            | 2010 | -1.527 | 0.127  | 0.342      |      |
|              |                            | 2011 | -0.482 | 0.630  | 0.816      |      |
|              |                            | 2012 | 0.776  | 0.438  | 0.709      |      |
|              |                            | 2013 | 1.253  | 0.210  | 0.462      |      |
| scikit-learn | post:PR $\times$ nonmember | 2014 | -0.897 | 0.370  | 0.645      |      |
|              |                            | 2015 | 0.381  | 0.703  | 0.872      |      |
|              |                            | 2016 | -0.666 | 0.505  | 0.750      |      |
|              |                            | 2017 | -0.326 | 0.744  | 0.900      |      |
|              |                            | 2018 | -0.316 | 0.752  | 0.902      |      |
|              |                            | 2010 | -0.808 | 0.419  | 0.704      |      |
|              |                            | 2011 | -0.977 | 0.329  | 0.621      |      |
|              |                            | 2012 | 1.489  | 0.137  | 0.358      |      |
|              |                            | 2013 | 0.139  | 0.890  | 0.948      |      |
| scikit-learn | post:issue $\times$ member | 2014 | -0.100 | 0.921  | 0.957      |      |
|              |                            | 2015 | -0.264 | 0.792  | 0.919      |      |
|              |                            | 2016 | -0.950 | 0.342  | 0.625      |      |
|              |                            | 2017 | -1.632 | 0.103  | 0.286      |      |

Continued on next page

| Project      | Contrast                      | Year | t-stat | p-val. | p-val adj. | sig. |
|--------------|-------------------------------|------|--------|--------|------------|------|
|              |                               | 2018 | -2.810 | 0.005  | 0.029      | *    |
|              |                               | 2010 | -0.774 | 0.439  | 0.709      |      |
|              |                               | 2011 | 0.676  | 0.499  | 0.750      |      |
|              |                               | 2012 | 2.465  | 0.014  | 0.066      | .    |
|              |                               | 2013 | 0.851  | 0.395  | 0.669      |      |
| scikit-learn | post:issue $\times$ nonmember | 2014 | 1.329  | 0.184  | 0.426      |      |
|              |                               | 2015 | 3.691  | 0.000  | 0.002      | **   |
|              |                               | 2016 | 1.610  | 0.107  | 0.295      |      |
|              |                               | 2017 | 2.042  | 0.041  | 0.151      |      |
|              |                               | 2018 | 1.156  | 0.248  | 0.521      |      |
|              |                               | 2011 | 1.646  | 0.100  | 0.283      |      |
|              |                               | 2012 | 0.970  | 0.332  | 0.623      |      |
|              |                               | 2013 | 8.729  | 0.000  | 0.000      | ***  |
| scipy        | comment:PR $\times$ member    | 2014 | 3.370  | 0.001  | 0.007      | **   |
|              |                               | 2015 | 3.172  | 0.002  | 0.012      | *    |
|              |                               | 2016 | 5.637  | 0.000  | 0.000      | ***  |
|              |                               | 2017 | 4.499  | 0.000  | 0.000      | ***  |
|              |                               | 2018 | 7.312  | 0.000  | 0.000      | ***  |
|              |                               | 2011 | -0.561 | 0.575  | 0.796      |      |
|              |                               | 2012 | -0.687 | 0.492  | 0.747      |      |
|              |                               | 2013 | -0.390 | 0.696  | 0.868      |      |
| scipy        | comment:PR $\times$ nonmember | 2014 | 3.155  | 0.002  | 0.012      | *    |
|              |                               | 2015 | 2.228  | 0.026  | 0.105      |      |
|              |                               | 2016 | 1.017  | 0.309  | 0.601      |      |
|              |                               | 2017 | 2.258  | 0.024  | 0.103      |      |
|              |                               | 2018 | 3.027  | 0.002  | 0.016      | *    |
|              |                               | 2013 | -0.402 | 0.688  | 0.862      |      |

Continued on next page

scipy comment:issue  $\times$  member

| Project | Contrast                         | Year | t-stat | p-val. | p-val adj. | sig. |
|---------|----------------------------------|------|--------|--------|------------|------|
|         |                                  | 2014 | 0.863  | 0.388  | 0.663      |      |
|         |                                  | 2015 | -0.765 | 0.444  | 0.711      |      |
|         |                                  | 2016 | 1.841  | 0.066  | 0.216      |      |
|         |                                  | 2017 | 1.294  | 0.196  | 0.435      |      |
|         |                                  | 2018 | 1.650  | 0.099  | 0.282      |      |
|         |                                  | 2013 | -2.572 | 0.010  | 0.051      | .    |
|         |                                  | 2014 | 0.976  | 0.329  | 0.621      |      |
| scipy   | comment:issue $\times$ nonmember | 2015 | 1.321  | 0.187  | 0.429      |      |
|         |                                  | 2016 | 1.941  | 0.052  | 0.178      |      |
|         |                                  | 2017 | 1.948  | 0.051  | 0.177      |      |
|         |                                  | 2018 | 2.044  | 0.041  | 0.151      |      |
|         |                                  | 2011 | -0.445 | 0.656  | 0.833      |      |
|         |                                  | 2012 | 0.319  | 0.749  | 0.902      |      |
|         |                                  | 2013 | 1.521  | 0.128  | 0.344      |      |
| scipy   | post:PR $\times$ member          | 2014 | 0.904  | 0.366  | 0.645      |      |
|         |                                  | 2015 | 0.100  | 0.920  | 0.957      |      |
|         |                                  | 2016 | 1.669  | 0.095  | 0.277      |      |
|         |                                  | 2017 | -0.488 | 0.626  | 0.816      |      |
|         |                                  | 2018 | -0.556 | 0.578  | 0.796      |      |
|         |                                  | 2011 | 2.348  | 0.019  | 0.083      | .    |
|         |                                  | 2012 | 0.337  | 0.736  | 0.896      |      |
|         |                                  | 2013 | -0.355 | 0.723  | 0.887      |      |
| scipy   | post:PR $\times$ nonmember       | 2014 | -0.292 | 0.771  | 0.913      |      |
|         |                                  | 2015 | 0.725  | 0.468  | 0.725      |      |
|         |                                  | 2016 | 0.935  | 0.350  | 0.631      |      |
|         |                                  | 2017 | -0.064 | 0.949  | 0.971      |      |
|         |                                  | 2018 | 1.289  | 0.197  | 0.436      |      |

Continued on next page

| Project        | Contrast                         | Year | t-stat | p-val. | p-val adj. | sig.                   |
|----------------|----------------------------------|------|--------|--------|------------|------------------------|
| scipy          | post:issue $\times$ member       | 2013 | 0.502  | 0.616  | 0.812      |                        |
|                |                                  | 2014 | 0.905  | 0.365  | 0.645      |                        |
|                |                                  | 2015 | 0.803  | 0.422  | 0.704      |                        |
|                |                                  | 2016 | 1.117  | 0.264  | 0.544      |                        |
|                |                                  | 2017 | 0.300  | 0.764  | 0.908      |                        |
|                |                                  | 2018 | 0.051  | 0.959  | 0.973      |                        |
| scipy          | post:issue $\times$ nonmember    | 2013 | -0.205 | 0.838  | 0.931      |                        |
|                |                                  | 2014 | 0.555  | 0.579  | 0.796      |                        |
|                |                                  | 2015 | -0.153 | 0.879  | 0.946      |                        |
|                |                                  | 2016 | 1.418  | 0.156  | 0.389      |                        |
|                |                                  | 2017 | 2.262  | 0.024  | 0.102      |                        |
|                |                                  | 2018 | 1.357  | 0.175  | 0.412      |                        |
| sphinx-gallery | comment:PR $\times$ member       | 2015 | -2.683 | 0.007  | 0.039      | *                      |
|                |                                  | 2016 | -1.493 | 0.135  | 0.357      |                        |
|                |                                  | 2017 | -3.609 | 0.000  | 0.003      | **                     |
|                |                                  | 2018 | -0.757 | 0.449  | 0.712      |                        |
| sphinx-gallery | comment:PR $\times$ nonmember    | 2014 | -0.698 | 0.485  | 0.741      |                        |
|                |                                  | 2015 | -2.797 | 0.005  | 0.030      | *                      |
|                |                                  | 2016 | -1.755 | 0.079  | 0.241      |                        |
|                |                                  | 2017 | -0.585 | 0.559  | 0.792      |                        |
|                |                                  | 2018 | -0.072 | 0.943  | 0.968      |                        |
| sphinx-gallery | comment:issue $\times$ member    | 2015 | -0.866 | 0.387  | 0.663      |                        |
|                |                                  | 2016 | -0.574 | 0.566  | 0.793      |                        |
|                |                                  | 2017 | -0.788 | 0.430  | 0.709      |                        |
|                |                                  | 2018 | 0.558  | 0.577  | 0.796      |                        |
| sphinx-gallery | comment:issue $\times$ nonmember | 2014 | -0.897 | 0.370  | 0.645      |                        |
|                |                                  | 2015 | -2.105 | 0.035  | 0.135      |                        |
| sphinx-gallery | comment:issue $\times$ nonmember |      |        |        |            | Continued on next page |

| Project        | Contrast               | Year | t-stat | p-val. | p-val adj. | sig. |
|----------------|------------------------|------|--------|--------|------------|------|
|                |                        | 2016 | 0.236  | 0.813  | 0.921      |      |
|                |                        | 2017 | 2.238  | 0.025  | 0.105      |      |
|                |                        | 2018 | 3.238  | 0.001  | 0.010      | **   |
|                |                        | 2015 | 0.182  | 0.856  | 0.940      |      |
| sphinx-gallery | post:PR × member       | 2016 | 0.141  | 0.888  | 0.948      |      |
|                |                        | 2017 | 0.074  | 0.941  | 0.968      |      |
|                |                        | 2018 | -0.121 | 0.904  | 0.954      |      |
|                |                        | 2014 | 0.173  | 0.863  | 0.943      |      |
|                |                        | 2015 | 0.966  | 0.334  | 0.623      |      |
| sphinx-gallery | post:PR × nonmember    | 2016 | -0.244 | 0.807  | 0.920      |      |
|                |                        | 2017 | 1.231  | 0.218  | 0.472      |      |
|                |                        | 2018 | -0.049 | 0.961  | 0.973      |      |
|                |                        | 2015 | 0.204  | 0.838  | 0.931      |      |
| sphinx-gallery | post:issue × member    | 2016 | -0.284 | 0.776  | 0.917      |      |
|                |                        | 2017 | 0.589  | 0.556  | 0.792      |      |
|                |                        | 2018 | 0.161  | 0.872  | 0.943      |      |
|                |                        | 2014 | -0.036 | 0.971  | 0.980      |      |
|                |                        | 2015 | -1.336 | 0.182  | 0.423      |      |
| sphinx-gallery | post:issue × nonmember | 2016 | 2.017  | 0.044  | 0.157      |      |
|                |                        | 2017 | 2.655  | 0.008  | 0.041      | *    |
|                |                        | 2018 | 0.277  | 0.782  | 0.918      |      |

**Supplementary Table 4**

*Results of analyses of changes in log of gratitude count over time by project, activity (posted issue [post:issue], comment on an issue [comment:issue], posted pull request [post:PR], or comment on a pull request [comment:PR]), and membership (member or nonmember at time of post). All p-values adjusted for multiple comparisons using Benjamini-Hochberg. Legend: . =  $p < .10$ ; \* =  $p < .05$ ; \*\* =  $p < .001$ ; \*\*\* =  $p < .0001$*

|    |                                       | t-stat | p-val. | p-val adj. | sig.  |     |
|----|---------------------------------------|--------|--------|------------|-------|-----|
|    | $\mu_{PR} = \mu_{issue}$              | 5.542  | 0.000  | 0.000      | ***   |     |
|    | Time opened                           | -0.975 | 0.330  | 0.369      |       |     |
|    | Cumulative grateful words on comments | 6.722  | 0.000  | 0.000      | ***   |     |
| 1W | Maximum negative sentiment score      | 1.367  | 0.172  | 0.217      |       |     |
|    | Number of comments                    | 9.338  | 0.000  | 0.000      | ***   |     |
|    | Comment member ratio                  | -8.344 | 0.000  | 0.000      | ***   |     |
|    | Mean sentiment score                  | 6.342  | 0.000  | 0.000      | ***   |     |
|    |                                       | Issue  | 3.596  | 0.000      | 0.001 | *** |
|    | Time opened                           | PR     | -2.903 | 0.004      | 0.005 | **  |
|    |                                       | Issue  | -1.276 | 0.202      | 0.240 |     |
|    | Cumulative grateful words on comments | PR     | 3.872  | 0.000      | 0.000 | *** |
|    |                                       | Issue  | 4.012  | 0.000      | 0.000 | *** |
|    | Maximum negative sentiment score      | PR     | 6.535  | 0.000      | 0.000 | *** |
| 2W |                                       | Issue  | -4.281 | 0.000      | 0.000 | *** |
|    | Number of comments                    | PR     | -8.937 | 0.000      | 0.000 | *** |
|    |                                       | Issue  | 4.387  | 0.000      | 0.000 | *** |
|    | Comment member ratio                  | PR     | -0.824 | 0.410      | 0.433 |     |
|    |                                       | Issue  | 0.059  | 0.953      | 0.953 |     |
|    | Mean sentiment score                  | PR     | 3.011  | 0.003      | 0.004 | **  |

### Supplementary Table 5

*Results of analyses predicting newcomer retention by contribution type and metrics of the community's response to the newcomer. All p-values adjusted for multiple comparisons using Benjamini-Hochberg. Legend: . =  $p < .10$ ; \* =  $p < .05$ ; \*\* =  $p < .001$ ; \*\*\* =  $p < .0001$*



|    |                                       | t-stat       | p-val. | p-val adj. | sig. |
|----|---------------------------------------|--------------|--------|------------|------|
|    | $\mu_{PR} = \mu_{issue}$              | 5.531        | 0.000  | 0.000      | ***  |
|    | Time opened                           | -1.296       | 0.195  | 0.253      |      |
|    | Cumulative grateful words on comments | 6.701        | 0.000  | 0.000      | ***  |
| 1W | Maximum negative sentiment score      | 1.400        | 0.162  | 0.225      |      |
|    | Maximum positive sentiment score      | 9.350        | 0.000  | 0.000      | ***  |
|    | Number of comments                    | -8.363       | 0.000  | 0.000      | ***  |
|    | Comment member ratio                  | 6.341        | 0.000  | 0.000      | ***  |
|    | Mean sentiment score                  | 3.298        | 0.001  | 0.002      | **   |
|    | Variance sentiment score              | -1.120       | 0.263  | 0.313      |      |
|    | Time opened                           | Issue -2.956 | 0.003  | 0.005      | **   |
|    |                                       | PR -1.275    | 0.202  | 0.253      |      |
|    | Cumulative grateful words on comments | Issue 4.107  | 0.000  | 0.000      | ***  |
|    |                                       | PR 4.011     | 0.000  | 0.000      | ***  |
|    | Maximum negative sentiment score      | Issue 6.617  | 0.000  | 0.000      | ***  |
|    |                                       | PR -4.288    | 0.000  | 0.000      | ***  |
|    | Maximum positive sentiment score      | Issue -9.562 | 0.000  | 0.000      | ***  |
|    |                                       | PR 4.387     | 0.000  | 0.000      | ***  |
| 2W | Number of comments                    | Issue -0.688 | 0.492  | 0.534      |      |
|    |                                       | PR 0.060     | 0.952  | 0.952      |      |
|    | Comment member ratio                  | Issue 3.400  | 0.001  | 0.001      | **   |
|    |                                       | PR 10.871    | 0.000  | 0.000      | ***  |
|    | Mean sentiment score                  | Issue 5.300  | 0.000  | 0.000      | ***  |
|    |                                       | PR 0.452     | 0.651  | 0.678      |      |
|    | Variance sentiment score              | Issue -0.970 | 0.332  | 0.377      |      |
|    |                                       | PR 1.527     | 0.127  | 0.186      |      |

Continued on next page

---

t-stat p-val. p-val adj. sig.

---

**Supplementary Table 6**

*Results of analyses predicting newcomer retention by contribution type and metrics of the community's response to the newcomer, with two post hoc additions. All p-values adjusted for multiple comparisons using Benjamini-Hochberg. Legend: . =  $p < .10$ ; \* =  $p < .05$ ; \*\* =  $p < .001$ ; \*\*\* =  $p < .0001$*

---

|                | Issues | Pull requests | Comments on issues | Comments on PRs | Authors | Dependent |
|----------------|--------|---------------|--------------------|-----------------|---------|-----------|
| matplotlib     | 4819   | 7385          | 28904              | 36688           |         | 14527     |
| mayavi         | 445    | 290           | 1392               | 758             | 446     | 59        |
| numpy          | 6239   | 5607          | 29940              | 31168           | 3625    | 35175     |
| pandas         | 13412  | 10264         | 60673              | 68656           | 6806    | 19806     |
| scikit-image   | 1195   | 2104          | 6397               | 15182           | 1023    | 1756      |
| scikit-learn   | 5427   | 6856          | 34201              | 68224           | 5317    | 5942      |
| scipy          | 4989   | 4349          | 22151              | 26711           | 3062    | 14945     |
| sphinx-gallery | 195    | 223           | 975                | 1833            | 90      | 236       |
| all            | 31902  | 29693         | 155729             | 212532          | 16968   |           |

### Supplementary Table 7

*Summary statistics for the current dataset, broken down by project. Dependent package and repository statistics obtained from GitHub's dependency graph in June 2021. Impact percentile from Depsy's 2016 analysis of Python ecosystem (?); - **sphinx-gallery** not included in Depsy analysis.*

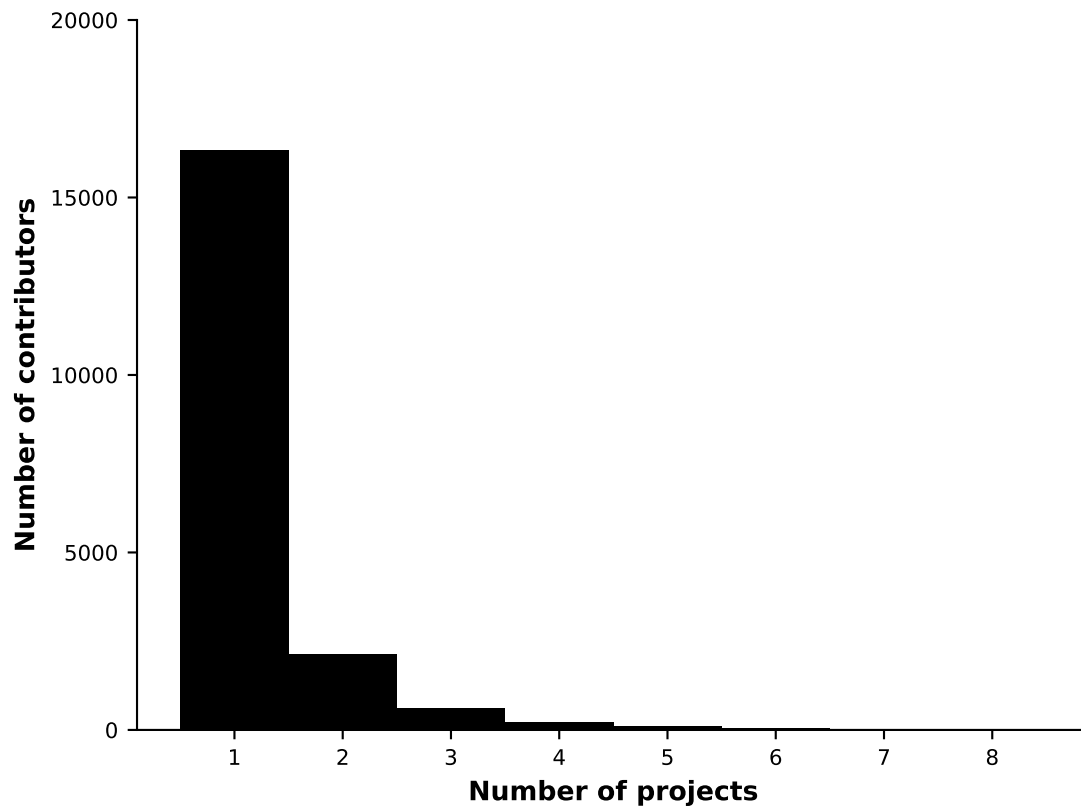

*Supplementary Figure 1.* Histogram of number of projects to which a single user contributes.
